# **Convergent evolution of the SARS-CoV-2 Omicron subvariants leading to the emergence of BQ.1.1 variant**

Jumpei Ito<sup>1,#</sup>, Rigel Suzuki<sup>2,#</sup>, Keiya Uriu<sup>1,3,#</sup>, Yukari Itakura<sup>4,#</sup>, Jiri Zahradnik<sup>5,6,#</sup>, Sayaka Deguchi<sup>7,#</sup>, Lei Wang<sup>8,9,#</sup>, Spyros Lytras<sup>10,#</sup>, Tomokazu Tamura<sup>2</sup>, Izumi Kida<sup>11</sup>, Hesham Nasser<sup>12,13</sup>, Maya Shofa<sup>14,15</sup>, MST Monira Begum<sup>12</sup>, Masumi Tsuda<sup>8,9</sup>, Yoshitaka Oda<sup>8</sup>, Shigeru Fujita<sup>1,3</sup>, Kumiko Yoshimatsu<sup>16</sup>, Hayato Ito<sup>2</sup>, Naganori Nao<sup>17,21</sup>, Hiroyuki Asakura<sup>18</sup>, Mami Nagashima<sup>18</sup>, Kenji Sadamasu<sup>18</sup>, Kazuhisa Yoshimura<sup>18</sup>, Yuki Yamamoto<sup>19</sup>, Tetsuharu Nagamoto<sup>19</sup>, Gideon Schreiber<sup>5</sup>, The Genotype to Phenotype Japan (G2P-Japan) Consortium, Akatsuki Saito<sup>14,15,20</sup>, Keita Matsuno<sup>11,21,22</sup>, Kazuo Takayama<sup>7,23</sup>, Shinya Tanaka<sup>8,9\*</sup>, Takasuke Fukuhara<sup>2,23,24\*</sup>, Terumasa Ikeda<sup>12\*</sup>, Kei Sato<sup>1,3,25,26,27,28,29\*</sup>

<sup>1</sup>Division of Systems Virology, Department of Microbiology and Immunology, The Institute of Medical Science, The University of Tokyo, Tokyo, Japan

<sup>2</sup>Department of Microbiology and Immunology, Faculty of Medicine, Hokkaido University, Sapporo, Japan.

<sup>3</sup>Graduate School of Medicine, The University of Tokyo, Tokyo, Japan

<sup>4</sup>Division of Molecular Pathobiology, International Institute for Zoonosis Control, Hokkaido University, Sapporo, Japan.

<sup>5</sup>Department of Biomolecular Sciences, Weizmann Institute of Science, Rehovot, Israel

<sup>6</sup>First Medical Faculty at Biocev, Charles University, Vestec-Prague, Czechia

<sup>7</sup>Center for iPS Cell Research and Application (CiRA), Kyoto University, Kyoto, Japan

<sup>8</sup>Department of Cancer Pathology, Faculty of Medicine, Hokkaido University, Sapporo, Japan

<sup>9</sup>Institute for Chemical Reaction Design and Discovery (WPI-ICReDD), Hokkaido University, Sapporo, Japan

<sup>10</sup>Medical Research Council-University of Glasgow Centre for Virus Research, Glasgow, UK.

<sup>11</sup>Division of Risk Analysis and Management, International Institute for Zoonosis Control, Hokkaido University, Sapporo, Japan

<sup>12</sup>Division of Molecular Virology and Genetics, Joint Research Center for Human Retrovirus infection, Kumamoto University, Kumamoto, Japan

<sup>13</sup>Department of Clinical Pathology, Faculty of Medicine, Suez Canal University, Ismailia, Egypt

<sup>14</sup>Department of Veterinary Science, Faculty of Agriculture, University of Miyazaki, Miyazaki, Japan

<sup>15</sup>Graduate School of Medicine and Veterinary Medicine, University of Miyazaki, Miyazaki, Japan

<sup>16</sup>Institute for Genetic Medicine, Hokkaido University, Sapporo, Japan

44 <sup>17</sup>Division of International Research Promotion, International Institute for  
 45 Zoonosis Control, Hokkaido University, Sapporo, Japan  
 46 <sup>18</sup>Tokyo Metropolitan Institute of Public Health, Tokyo, Japan  
 47 <sup>19</sup>HiLung, Inc., Kyoto, Japan  
 48 <sup>20</sup>Center for Animal Disease Control, University of Miyazaki, Miyazaki, Japan  
 49 <sup>21</sup>One Health Research Center, Hokkaido University, Sapporo, Japan  
 50 <sup>22</sup>International Collaboration Unit, International Institute for Zoonosis Control,  
 51 Hokkaido University, Sapporo, Japan  
 52 <sup>23</sup>AMED-CREST, Japan Agency for Medical Research and Development  
 53 (AMED), Tokyo, Japan  
 54 <sup>24</sup>Laboratory of Virus Control, Research Institute for Microbial Diseases, Osaka  
 55 University, Suita, Japan  
 56 <sup>25</sup>International Research Center for Infectious Diseases, The Institute of Medical  
 57 Science, The University of Tokyo, Tokyo, Japan  
 58 <sup>26</sup>International Vaccine Design Center, The Institute of Medical Science, The  
 59 University of Tokyo, Tokyo, Japan  
 60 <sup>27</sup>Graduate School of Frontier Sciences, The University of Tokyo, Kashiwa,  
 61 Japan  
 62 <sup>28</sup>Collaboration Unit for Infection, Joint Research Center for Human Retrovirus  
 63 infection, Kumamoto University, Kumamoto, Japan  
 64 <sup>29</sup>CREST, Japan Science and Technology Agency, Kawaguchi, Japan  
 65 #These authors contributed equally  
 66  
 67 \*Corresponding authors:  
 68 tanaka@med.hokudai.ac.jp (Shinya Tanaka),  
 69 fukut@pop.med.hokudai.ac.jp (Takasuke Fukuhara),  
 70 ikedat@kumamoto-u.ac.jp (Terumasa Ikeda),  
 71 KeiSato@g.ecc.u-tokyo.ac.jp (Kei Sato)  
 72  
 73 **Conflict of interest:** Yuki Yamamoto and Tetsuharu Nagamoto are founders  
 74 and shareholders of HiLung, Inc. Yuki Yamamoto is a co-inventor of patents  
 75 (PCT/JP2016/057254; "Method for inducing differentiation of alveolar epithelial  
 76 cells", PCT/JP2016/059786, "Method of producing airway epithelial cells"). The  
 77 other authors declare that no competing interests exist.  
 78  
 79 **Short title:** Characteristics of SARS-CoV-2 BQ.1.1 (36/50 characters)  
 80 **Keywords:** SARS-CoV-2; COVID-19; Omicron; BQ.1.1; convergent evolution;  
 81 transmissibility; immune resistance; pathogenicity

82 **Abstract** (150 words)

83 In late 2022, although the SARS-CoV-2 Omicron subvariants have highly  
 84 diversified, some lineages have convergently acquired amino acid substitutions  
 85 at five critical residues in the spike protein. Here, we illuminated the evolutionary  
 86 rules underlying the convergent evolution of Omicron subvariants and the  
 87 properties of one of the latest lineages of concern, BQ.1.1. Our phylogenetic and  
 88 epidemic dynamics analyses suggest that Omicron subvariants independently  
 89 increased their viral fitness by acquiring the convergent substitutions.  
 90 Particularly, BQ.1.1, which harbors all five convergent substitutions, shows the  
 91 highest fitness among the viruses investigated. Neutralization assays show that  
 92 BQ.1.1 is more resistant to breakthrough BA.2/5 infection sera than BA.5. The  
 93 BQ.1.1 spike exhibits enhanced binding affinity to human ACE2 receptor and  
 94 greater fusogenicity than the BA.5 spike. However, the pathogenicity of BQ.1.1  
 95 in hamsters is comparable to or even lower than that of BA.5. Our multiscale  
 96 investigations provide insights into the evolutionary trajectory of Omicron  
 97 subvariants.

## 98 Introduction

99 As of November 2022, the SARS-CoV-2 Omicron variant (B.1.1.529 and BA  
100 lineages) is the only current variant of concern (VOC)<sup>1</sup>. At the end of November  
101 2021, Omicron BA.1 rapidly outcompeted Delta, a prior VOC. Soon after the  
102 global spread of Omicron BA.1 lineage, Omicron BA.2 became predominant in  
103 the world. Thereafter, a variety of BA.2 descendants, such as BA.5 and BA.2.75,  
104 emerged and are becoming predominant in certain countries.

105 Omicron BA.2 is highly diversified after emergence and is the origin of  
106 other recently emerging Omicron subvariants. Although both BA.5 and BA.2.75  
107 diversified from BA.2, these two Omicron subvariants are phylogenetically  
108 independent to each other, suggesting that these two variants emerged  
109 independently<sup>2</sup>. However, recent studies including ours have demonstrated that  
110 the spike (S) proteins of these two variants exhibit similar evolutionary patterns:  
111 one is amino acid substitutions to evade antiviral humoral immunity, while the  
112 other is the substitution to increase the binding affinity to human angiotensin  
113 converting enzyme 2 (ACE2), the receptor for SARS-CoV-2 infection. For BA.5,  
114 the F486V substitution contributes to evasion from antiviral humoral immunity<sup>3-6</sup>,  
115 while the L452R substitution increases ACE2 binding affinity<sup>4,7-9</sup>. For BA.2.75,  
116 the G446S substitution is responsible for evasion from antiviral humoral  
117 immunity<sup>6,10-14</sup>, while the N460K substitution increases ACE2 binding affinity<sup>2,7,11</sup>.  
118 Because the substitutions in the S protein, that confer resistance to antiviral  
119 immunity, such as F486V and G446S, reduce the affinity to human ACE2<sup>2,15</sup>, it is  
120 conceivable to assume that the additional substitutions, such as L452R and  
121 N460K, compensate the decreased ACE2 binding affinity<sup>2,15</sup>.

122 Another common feature of BA.5 and BA.2.75 we found is the greater  
123 pathogenicity compared to BA.2 in a hamster model<sup>2,15</sup>. Because BA.5 and  
124 BA.2.75 are descendants of BA.2, our observations suggest that these two  
125 variants evolved to increase intrinsic pathogenicity. Importantly, our previous  
126 studies that focused on Delta<sup>16</sup>, Omicron BA.1<sup>17</sup>, Omicron BA.2<sup>18</sup>, Omicron  
127 BA.5<sup>15</sup>, and Omicron BA.2.75<sup>2</sup> suggested that viral intrinsic pathogenicity in  
128 hamsters is closely associated with viral fusogenicity in cell culture system.  
129 Because previous studies suggest that higher fusogenicity is partly attributed to  
130 the increased affinity to human ACE2<sup>11,15,18,19</sup>, the substitutions in the S proteins  
131 of BA.5 (L452R) and BA.2.75 (N460K) can result in increasing intrinsic  
132 pathogenicity in hamsters.

133 Until the emergence of BA.5, the newly emerging SARS-CoV-2 variant  
134 globally outcompeted the previously predominant variant in a few months.  
135 However, as of November 2022, although a variety of Omicron BA.2 subvariants,  
136 including BA.2.75, have emerged after BA.5, none of them have successfully  
137 outcompeted BA.5 yet. Instead of the emergence of an outstanding  
138 SARS-CoV-2 variant, recently emerging Omicron subvariants are under

139 convergent evolution: most variants have acquired substitutions at the same site  
 140 of S, such as R346, K444, L452, N460, or F486. Notably, BQ.1.1 is a  
 141 descendant of BA.5 and bears all five recent convergent mutations: R346T,  
 142 K444T, L452R, N460K, or F486V. As of October 12, 2022, the WHO classifies  
 143 BQ.1.1 as an Omicron subvariant under monitoring<sup>1</sup>. Particularly, the BQ.1.1 S  
 144 harbors two substitutions, L452R and N460K, that increase ACE2 binding affinity  
 145 and fusogenicity<sup>2,15</sup>. These observations raise the possibility that BQ.1.1 is more  
 146 fusogenic and pathogenic than BA.5. In this study, we illuminated the  
 147 evolutionary principals underlying the current convergent evolution of Omicron  
 148 lineages and characterized BQ.1.1 in terms of its transmissibility,  
 149 immunogenicity, fusogenicity and intrinsic pathogenicity. Our results suggest  
 150 that BQ.1.1 is a newly emerging variant that outcompete BA.5 and will be the  
 151 globally predominant variant in the near future.

## 152 Results

### 153 Convergent evolution of Omicron lineages

154 As of November 2022, various Omicron lineages have continuously emerged,  
 155 such as Omicron BA.1, BA.2, BA.4, BA.5, and BA.2.75 (**Fig. 1a**). As shown in  
 156 **Fig. 1a**, BQ.1.1, a latest lineage of concern, emerged from the BA.5 cluster.  
 157 Notably, the substitutions in S protein, particularly R346X, K444X, L452X,  
 158 N460X, and F486X, seem to have convergently occurred in a variety of Omicron  
 159 lineages (hereafter we refer to these five amino acid residues as “convergent  
 160 sites” and substitutions at the residues as “convergent substitutions”) <sup>6</sup>. As  
 161 described in the Introduction, the BQ.1.1 S harbors these five convergent  
 162 substitutions, R346T, K444T, L452R, N460K, and F486V (**Fig. 1b, left**).  
 163 Additionally, BQ.1.1 possesses six substitutions in the non-S region when  
 164 compared to the parental BA.5 (**Fig. 1b, right**). To investigate the substitutions  
 165 at these five convergent sites during Omicron evolution in depth, we constructed  
 166 phylogenetic trees for BA.1, BA.2 (including BA.2.75), BA.4, and BA.5 (including  
 167 BQ.1.1) and identified the branches on the trees where the convergent  
 168 substitutions occurred (**Fig. 1c**). The R346 residue showed relatively higher  
 169 substitution frequency compared to the other residues in all Omicron lineages  
 170 (**Fig. 1c–e**). Consistent with our previous study <sup>15</sup>, the L452 residue in BA.2  
 171 showed the highest substitution frequency in that lineage (**Fig. 1c–e**).  
 172 Importantly, the substitution events were more frequently detected in relatively  
 173 younger lineages such as BA.4, BA.5, and BA.2.75 when compared to relatively  
 174 older BA.1 and BA.2 lineages (**Fig. 1c–e, Extended Data Fig. 1a**). For instance,  
 175 the R346X and K444X substitutions in BA.4 and BA.5 and the R346X and  
 176 F486X substitutions in BA.2.75 showed substantially higher substitution  
 177 frequencies compared to those in the other lineages (**Fig. 1c**). The substitution  
 178 frequencies at R346 and K444 in BA.5 were approximately 10.4- and 9.4-times  
 179 higher than those in BA.2, respectively (**Fig. 1e and Supplementary Table 1**).

### 181 Amino acid substitutions at the convergent sites increase viral fitness

182 We next hypothesized that the substitutions at these five convergent sites  
 183 conferred certain selective advantages during the evolution of Omicron. To test  
 184 this hypothesis, we modeled the relationship between viral epidemic dynamics  
 185 and the substitutions in S protein and estimated the effects of all S substitutions  
 186 on viral fitness [i.e., relative effective reproduction number ( $R_e$ )]. We classified  
 187 the viral sequences of Omicron according to the combination of amino acid  
 188 substitutions (referred to as “S haplotype”). Subsequently, we established a  
 189 Bayesian hierarchical model, which represents the epidemic dynamics of the S  
 190 haplotype-based viral groups according to relative  $R_e$  represented by a linear  
 191 combination of the effect of S substitutions (see **Methods**). This model can  
 192 simultaneously estimate i) the effect of each S substitution on  $R_e$  and ii) the

relative  $R_e$  of a viral group represented by each S haplotype. We analyzed the dataset for 375,121 Omicron sequences collected in the United Kingdom (UK) from March 1<sup>st</sup>, 2022, to October 15<sup>th</sup>, 2022, which includes 254 S haplotypes according to the pattern of 107 substitutions in S protein [or substitution clusters (**Extended Data Fig. 1b**)]. We first investigated the effects of S substitution on  $R_e$  (**Fig. 1f**, **Extended Data Fig. 1c** and **Supplementary Table 2**). As substitutions with negative effects on  $R_e$ , the cluster of substitutions specific to BA.1 – the earliest Omicron lineage with the lowest  $R_e$  overall – and Q493R – acquired once in the common ancestor of Omicron but subsequently lost in BA.5 and BA.2.75 – were identified (**Fig. 1a,f**, **Extended Data Fig. 1c** and **Supplementary Table 2**). On the other hand, as substitutions with positive effects on  $R_e$ , substitutions at the five convergent sites were identified (**Fig. 1f**, **Extended Data Fig. 1c** and **Supplementary Table 2**). Particularly, i) the L452R and F486V substitutions, acquired by the common ancestor of BA.4 and BA.5, ii) L452Q, acquired by BA.2.12.1<sup>15</sup>, and iii) N460K, acquired by BA.2.75 and BQ.1.1 independently, showed higher positive effects (**Fig. 1f**, **Extended Data Fig. 1c** and **Supplementary Table 2**). Next, we investigated relative  $R_e$  values for viral groups represented by respective S haplotypes (**Fig. 1g**, **Extended Data Fig. 1d** and **Supplementary Table 3**). We found that S haplotypes with substitutions at the convergent sites, particularly with R346T, K444T, L452R, N460K, and F486V, tended to show higher  $R_e$  values (**Fig. 1g**). Notably, the S haplotype corresponding to BQ.1.1, harboring all five aforementioned convergent substitutions, showed the highest  $R_e$  value, followed by S haplotypes corresponding to BQ.1, harboring all substitutions apart from R346T (**Fig. 1g** and **Supplementary Table 3**).

To quantify the impact of substitutions at the convergent sites for viral fitness, we inferred the proportion of the variation of  $R_e$  that can be explained by these substitutions in the Omicron lineages. We first calculated the total effect of substitutions at the convergent sites for each S haplotype. Subsequently, we compared this quantity with the relative  $R_e$  value for each S haplotype (**Fig. 1h**). These two quantities were strongly correlated ( $R^2=0.816$ ), suggesting that a larger proportion (81.6%) of the variation of  $R_e$  in the Omicron lineages can be explained by substitutions at the convergent sites under our model.

Using the Bayesian hierarchical model above, we can predict relative viral fitness for arbitrary S sequences only based on the profile of S substitutions (see **Methods**). Utilizing this property of this model, we next inferred the evolutionary change in viral fitness during BA.5 diversification. We reconstructed the ancestral profile of S substitutions for each node in the BA.5 tree. Subsequently, we predicted relative viral fitness for each node according to the reconstructed S substitution profile using the model above (**Fig. 1i**). This analysis suggested that the viral fitness was independently elevated in multiple lineages during BA.5

diversification, coupled with the substitution events at the convergent sites (**Fig. 1i, left**). Finally, we inferred the evolutionary changes in viral fitness specific to the emergence of BQ.1.1 and revealed that the ancestral lineage of BQ.1.1 has acquired the K444T, N460K, and R346T substitutions in this order (**Fig. 1i, right**)<sup>20</sup>. Importantly, our analysis predicted that the ancestral lineage of BQ.1.1 has increased its viral fitness step-by-step consistently with the acquisitions of these substitutions (**Fig. 1i, right**). Taken together, our results suggest that the sublineages descending from BA.5, including BQ.1.1, convergently increased viral fitness by consecutively acquiring substitutions at the R346, N460, and K444 residues.

# **Immune resistance of BQ.1.1**

It has been recently reported that BQ.1.1 exhibits profound resistance to all therapeutic monoclonal antibodies currently approved by the Food and Drug Administration (FDA) in the United States<sup>6,21</sup>. Also, some substitutions detected in BQ.1.1, such as R346T and K444T, contribute to the resistance to 3-dose treatment of an inactivated vaccine (CoronaVac) and breakthrough infections or prior Omicron subvariants (including BA.1, BA.2 and BA.5) after CoronaVac vaccination<sup>6</sup>. However, the immune resistance of BQ.1.1 to breakthrough infections or prior Omicron subvariants after mRNA vaccine treatment remains unaddressed. To experimentally investigate the virological features of BQ.1.1, we first evaluated the immune resistance of BQ.1.1 using HIV-1-based pseudoviruses. Consistent with our recent study<sup>15</sup>, BA.5 (2.5-fold) and BQ.1.1 (6.9-fold) were significantly more resistant to breakthrough BA.2 infection sera than BA.2 (**Fig. 2a**). Additionally, BQ.1.1 exhibited more profound resistance to breakthrough BA.2 infection sera than BA.5 (2.7-fold,  $p=0.0076$ ) (**Fig. 2a**). As shown in **Fig. 1a**, the BQ.1.1 S harbors three additional substitutions in the BA.5 S: R346T, K444T and N460K. To determine the responsible substitution(s) for immune resistance of BQ.1.1 to breakthrough BA.2 infection sera, we prepared the BA.5 derivatives bearing either of these three substitutions. However, any BA.5-based derivatives prepared did not exhibit resistance to breakthrough BA.2 infection sera compared to BA.5 (**Fig. 2a**), suggesting that multiple substitutions cooperatively contribute to the immune resistance of BQ.1.1 to breakthrough BA.2 infection sera. In the case of breakthrough BA.5 infection sera, BQ.1.1 was significantly (5.6-fold) more resistant to breakthrough BA.5 infection sera than BA.5 ( $p<0.0001$ ) (**Fig. 2b**). Importantly, the breakthrough BA.5 infection sera obtained from six individuals (five breakthrough infection cases after 3-dose vaccination and a breakthrough infection case after 2-dose vaccination) did not exhibit antiviral effect against BQ.1.1 in this experimental setup. We then assessed the determinant substitutions to be resistant to breakthrough BA.5 infection sera. The N460K substitution conferred significant resistance to

breakthrough BA.5 infection sera (1.6-fold,  $p=0.016$ ), while the other two substitutions did not affect the immune resistance to breakthrough BA.5 infection sera (**Fig. 2b**). When compared to the immune resistance of BQ.1.1 to breakthrough BA.5 infection sera (5.6-fold), the resistance acquired by the N460K substitution (1.6-fold) is relatively less robust (**Fig. 2b**). Therefore, similar to breakthrough BA.2 infection sera, our results suggest that the immune resistance of BQ.1.1 to breakthrough BA.2 infection sera is attributed by multiple substitutions in the RBD of BQ.1.1 S.

To further address the difference in antigenicity among Omicron subvariants including BQ.1.1, we used the sera obtained from infected hamsters at 16 days postinfection (d.p.i.). Consistent with our previous studies<sup>2,15</sup>, the hamster sera infected with BA.2, BA.5 or BA.2.75 were most efficiently antiviral against the variant of virus infected, while these antisera were less or no cross-reactive against the other variants (**Fig. 2c**). In the case of BA.5 infection sera, BQ.1.1 was 1.8-fold more resistant to than BA.5 (**Fig. 2c**). To depict the difference of antigenicity among BA.2, BA.5, BA.2.75 and BQ.1.1, we analyzed the neutralization dataset using hamster sera (**Fig. 2c**). As shown in **Fig. 2d**, the cross-reactivity of each Omicron subvariant was well correlated to their phylogenetic relationship (**Fig. 1a**), and the antigenicity of BQ.1.1 is relatively more similar to BA.5 than BA.2 and BA.2.75. Nevertheless, our data show that BQ.1.1 exhibits a profound resistance to the humoral immunity induced by BA.5 breakthrough infection (**Fig. 2b**). These observations suggest that the three substitutions in BQ.1.1 S are critical and specific to evade the BA.5 infection-induced herd immunity in the human population.

### ACE2 binding affinity of BQ.1.1 S

We then evaluated the features of BQ.1.1 S that potentially affect viral infection and replication. Yeast surface display assay<sup>2,15,18,19,22-24</sup> showed that the  $K_D$  value of BQ.1.1 S RBD ( $0.66\pm0.11$ ) to human ACE2 molecule is significantly lower than that of parental BA.5 S RBD ( $1.08\pm0.16$ ) (**Fig. 3a**), suggesting that BQ.1.1 increased the binding affinity to human ACE2 during evolution from BA.5. To determine the responsible substitutions in the BQ.1.1 S that enhance ACE2 binding affinity, we prepared the RBDs of BA.2 and BA.5 S proteins that possess a BQ.1.1-specific substitution compared to parental BA.5 (i.e., R346T, K444T and N460K). Consistent with our recent study<sup>2</sup>, the N460K substitution significantly increased the binding affinity of the S proteins of BA.2 and BA.5 to human ACE2 (**Fig. 3a**). On the other hand, the K444 substitution significantly decreased ACE2 binding affinity regardless of the S backbone (**Fig. 3a**). The R346T substitution increased the ACE2 binding affinity of BA.2 S RBD but not that of BA.5 S RBD (**Fig. 3a**). The *in vitro* observations using yeasts (**Fig. 3a**) were then verified by using an HIV-1-based pseudovirus system. As shown in

**Fig. 3b**, the infectivity of BQ.1.1 pseudovirus was significantly higher than those of BA.2 (17-fold) and BA.5 (3.2-fold) pseudoviruses. In our recent study<sup>15</sup>, at least three mutations detected in the BA.5 S (compared to the BA.2 S), HV69-70del, L452R and F486V contribute to the increase of pseudovirus infectivity. When we particularly focus on the three additional mutations detected in the BQ.1.1 S compared to the BA.5 S, R346T, K444T and N460K, we found that R346T and N460K but not K444T significantly increase pseudovirus infectivity, and it is independent of the S backbone (**Fig. 3b**). To assess the association of TMPRSS2 usage with the increased pseudovirus infectivity of BQ.1.1, we used HEK293-ACE2/TMPRSS2 cells and HEK293-ACE2 cells, on which endogenous surface TMPRSS2 is undetectable<sup>18</sup> as target cells. As shown in **Fig. 3c**, the infectivity of BQ.1.1 pseudovirus was not increased by TMPRSS2 expression, suggesting that TMPRSS2 is not associated with an increase in the infectivity of BQ.1.1 pseudovirus.

### **Fusogenicity of BQ.1.1 S**

The fusogenicity of BQ.1.1 S was measured by the SARS-CoV-2 S-based fusion assay<sup>2,15-19,25</sup> using Calu-3 cells. Surface expression level of the BQ.1.1 S was significantly lower than that of BA.2, but the BQ.1.1 and BA.5 expression level were comparable (**Fig. 3d**). In the BA.2 S derivatives, R346T and N460K significantly decreased surface expression (**Fig. 3d**). In the BA.5 S derivatives, N460K significantly decreased surface expression, while K444T increased it (**Fig. 3d**). The fusogenicity of BA.5 S is greater than that of BA.2 S (**Fig. 3e**), which is consistent with our recent studies<sup>2,15</sup>. More importantly, the BQ.1.1 S was significantly more fusogenic than the BA.5 S (**Fig. 3f**). Additional experiments using the S derivatives based on BA.2 and BA.5 showed that the R346T and N460K substitutions significantly increased the S-mediated fusogenicity independently of the S backbone (**Fig. 3e,f**). Together with our recent studies<sup>2</sup>, the N460K substitution, which is detected in BA.2.75, increased ACE2 binding affinity (i.e., decrease of the  $K_D$  value) (**Fig. 3a**), increased pseudovirus infectivity (**Fig. 3b**) and the S-mediated fusogenicity (**Fig. 3e,f**). Interestingly, the R346T substitution also significantly increased ACE2 binding affinity and the S-based fusogenicity, while the K444T substitution negatively affected these experimental parameters (**Fig. 3b-f**). These results suggest that, compared to BA.5, the virological features of BQ.1.1 S, including increased ACE2 binding affinity, pseudovirus infectivity and fusogenicity, are attributed to the R346T and N460K substitutions.

### **Growth kinetics of BQ.1.1 *in vitro***

To investigate the growth kinetics of BQ.1.1 in *in vitro* cell culture systems, we inoculated clinical isolates of BA.2<sup>18</sup>, BA.5<sup>2</sup> and BQ.1.1 into multiple cell cultures.

The growth of BQ.1.1 in Vero cells (**Fig. 3g**) and VeroE6/TMPRSS2 cells (**Fig. 3h**) was significantly greater than that of BA.5, and the growth of BQ.1.1 and BA.5 was comparable in Calu-3 cells (**Fig. 3i**), human airway organoid-derived air-liquid interface (AO-ALI) system (**Fig. 3j**), and human induced pluripotent stem cell (iPSC)-derived alveolar epithelial cells (**Fig. 3l**). However, the growth of BQ.1.1 in iPSC-derived airway epithelial cells was significantly lower than that of BA.5 (**Fig. 3k**).

To evaluate the impact of BQ.1.1 infection on the airway epithelial and endothelial barriers, we used an airway-on-a-chip system<sup>2,26</sup>. By measuring the amount of virus that invades from the top channel (**Fig. 3m, left**) to the bottom channel (**Fig. 3m, middle**), we are able to evaluate the ability of viruses to disrupt the airway epithelial and endothelial barriers. Notably, the percentage of virus that invaded the bottom channel of BQ.1.1-infected airway-on-chip was significantly higher than that of BA.5-infected airway-on-chip (**Fig. 3m, right**). Together with the findings of S-based fusion assay (**Fig. 3f**), these results suggest that BQ.1.1 has higher fusogenic than BA.5.

373

#### 374 **Virological characteristics of BQ.1.1 *in vivo***

To investigate the virological features of BQ.1.1 *in vivo*, we inoculated clinical isolates of Delta<sup>16</sup>, BA.5<sup>2</sup>, and BQ.1.1. Consistent with our previous studies<sup>2,16</sup>, Delta infection resulted in weight loss (**Fig. 4a, left**). On the other hand, the body weights of BA.5- and BQ.1.1-infected hamsters did not increase compared with the negative control and relatively similar (**Fig. 4a, left**). We then analyzed the pulmonary function of infected hamsters as reflected by two parameters, enhanced pause (Penh) and the ratio of time to peak expiratory flow relative to the total expiratory time (Rpef). Among the four groups, Delta infection resulted in significant differences in these two respiratory parameters compared to BA.5 (**Fig. 4a, middle and right**), suggesting that Delta is more pathogenic than BA.5. In contrast, the Penh value of BQ.1.1-infected hamsters was significantly lower than that of BA.5-infected hamsters, and the Rpef value of BQ.1.1-infected hamsters was significantly higher than that of BA.5-infected hamsters (**Fig. 4a, middle and right**). These observations suggest that the pathogenicity of BQ.1.1 is similar to or even less than that of BA.5.

To evaluate the viral spread in infected hamsters, we routinely measured the viral RNA load in the oral swab. Although the viral RNA loads of the hamsters infected with Delta were significantly higher than those infected with BA.5, there was no statistical difference between BQ.1.1 and BA.5 (**Fig. 4b, left**). To address the possibility that BQ.1.1 more efficiently spreads in the respiratory tissues, we collected the lungs of infected hamsters at 2 and 5 d.p.i., and the collected tissues were separated into the hilum and periphery regions. However, the viral RNA loads in both lung hilum and periphery of BA.5-infected

hamsters were comparable to those of Delta- and BQ.1.1-infected hamsters (**Fig. 4b, middle and right**), suggesting that the spreading efficacy of BQ.1.1 in the lungs is comparable to BA.5. To further investigate the viral spread in the respiratory tissues of infected hamsters, we performed immunohistochemical (IHC) analysis targeting viral nucleocapsid (N) protein. Similar to our previous studies<sup>15,17,18</sup>, epithelial cells in the upper tracheae of infected hamsters were sporadically positive for viral N protein at 2 d.p.i., but there were no significant differences among the three viruses, including BQ.1.1 (**Extended Data Fig. 2a**), although tracheal inflammation tended to remain in BQ.1.1-infected hamsters. In the alveolar space around the bronchi/bronchioles at 2 d.p.i., N-positive cells were detected in Delta-infected hamsters (**Fig. 4c, left and Extended Data Fig. 2b**). In contrast, the percentage of N-positive cells in the lungs of BQ.1.1- and BA.5-infected hamsters were relatively low and comparable (**Fig. 4c, left and Extended Data Fig. 2b**). At 5 d.p.i., N-positive cells were detected in the peripheral alveolar space in Delta-infected hamsters, while the N-positive areas of BQ.1.1- and BA.5-infected hamsters were sporadic and faintly detectable (**Fig. 4c, right and Extended Data Fig. 2b**). These data suggest that the spreading efficiency of BQ.1.1 in the lungs of infected hamsters is comparable to that of BA.5.

#### **Intrinsic pathogenicity of BQ.1.1**

To investigate the intrinsic pathogenicity of BQ.1.1, we analyzed the formalin-fixed right lungs of infected hamsters at 2 and 5 d.p.i. by carefully identifying the four lobules and main bronchus and lobar bronchi sectioning each lobe along with the bronchial branches (**Fig. 4d**). Histopathological scoring was performed according to the criteria described in our previous studies<sup>27</sup>. Consistent with our previous studies<sup>2,16,17</sup>, all five histological parameters as well as the total score of the Delta-infected hamsters were significantly greater than those of the BA.5-infected hamsters (**Fig. 4e**). When we compared the histopathological scores of Omicron subvariants, total histopathological scores were comparable between BQ.1.1-infected hamsters and BA.5-infected hamsters with some enhancement of bronchitis/bronchiolitis at 2 d.p.i. and presence of type II pneumocytes at 5 d.p.i. of BQ.1.1 (**Fig. 4e**). Altogether, these histopathological analyses suggest that the intrinsic pathogenicity of BQ.1.1 is lower than that of Delta and comparable to that of BA.5.

## 433 Discussion

434 In the present study, we highlighted the amino acid substitutions that  
 435 convergently and frequently occurred in the residues R346, K444, L452, N460,  
 436 and F486 of the S proteins of relatively younger Omicron lineages, such as BA.4,  
 437 BA.5, and BA.2.75 (**Fig. 1a,c**). Our modeling analysis suggested that these five  
 438 frequent substitutions at the convergent sites increase viral fitness,  $R_e$  (**Fig. 1f**),  
 439 and a larger proportion (81.6%) of the  $R_e$  variation within Omicron can be  
 440 explained by substitutions in the convergent sites (**Fig. 1h**). Intriguingly, the viral  
 441 groups harboring the substitutions in convergent sites showed higher  $R_e$ , and  
 442 BQ.1.1, which harbors all convergent substitutions, showed the highest  $R_e$   
 443 among viral groups investigated (**Fig. 1g**). Moreover, the reconstruction of  
 444 ancestral viral fitness suggests that the ancestral lineage of BQ.1.1 has  
 445 increased viral fitness by acquiring substitutions at the convergent sites in a  
 446 stepwise manner (**Fig. 1i**). Altogether, our integrated approach of phylogenetic  
 447 and epidemic dynamics modeling analyses provides insights into the  
 448 evolutionary rules underlying the outstanding convergent evolution observed in  
 449 Omicron subvariants.

450 Our data provide two possibilities that explain the accumulated amino  
 451 acid substitutions at the convergent sites in relatively younger Omicron lineages,  
 452 such as BA.4, BA.5 and BA.2.75. One possibility is the epistasis among amino  
 453 acid substitutions: the fitness of a substitution differs dependent on the presence  
 454 of the other substitutions and/or the backbone sequence (similar to how the  
 455 original Omicron genotype likely emerged<sup>28</sup>). In our previous studies, the L452R  
 456 substitution in the BA.4/5 S<sup>15</sup> and the N460K substitution in the BA.2.75 S<sup>2</sup>  
 457 increase their binding ability to human ACE2. More importantly, we showed that  
 458 these substitutions can compensate for the negative effects of the other  
 459 substitutions that contribute to evasion from antiviral humoral immunity but  
 460 decrease ACE2 binding ability: for BA.4/5, L452R compensates for the  
 461 attenuated ACE2 binding affinity by the F486V substitution<sup>4,7-9</sup>, while for BA.2.75,  
 462 N460K compensates for the attenuated ACE2 binding affinity by the G446S  
 463 substitution<sup>2,7,11</sup>. Acquiring substitutions that potentially increase ACE2 binding  
 464 ability, such as L452R and N460K, can be one of the factors that increases  
 465 substitution frequency at the convergent sites in BA.4, BA.5, and BA.2.75. The  
 466 other possibility is that the effect of substitutions on viral fitness can be changed  
 467 over time due to changes in immune selective pressures in the human  
 468 population by vaccinations and/or natural infections with a variety of  
 469 SARS-CoV-2 variants. The substitutions at R346, K444, and F486 closely  
 470 associate with the escape from antiviral humoral immunity and monoclonal  
 471 antibodies<sup>5,6,15</sup>. In fact, here we demonstrated that the antigenicity of BQ.1.1 is  
 472 different from that of parental BA.5 and BQ.1.1 is more robustly resistant to the  
 473 antiviral humoral immunity induced by BA.2 and BA.5 breakthrough infections

than BA.5. Therefore, it is reasonable to assume that the effect of substitutions at these sites on viral fitness likely differs depending on the immune status in the human population. These two possibilities are not mutually exclusive, and these two factors could contribute to the accelerated substitutions at the convergent sites.

Based on our experimental results as well as recent reports, it is convincing that BQ.1.1 is one of the variants exhibiting profound resistance to the antiviral humoral immunity induced by breakthrough infections of BA.2 and BA.5 as well as therapeutic monoclonal antibodies<sup>6,21,29</sup>. Additionally, our experiments *in vitro* showed that the BQ.1.1 S exhibits higher affinity to human ACE2 and greater fusogenicity than BA.5, and these abilities are conferred by two substitutions, R346T and N460K. As expected, because BQ.1.1 bears two substitutions, L452R<sup>15</sup> and N460K<sup>2</sup>, both of which augment ACE2 binding affinity, BQ.1.1 has evolved to augment its fusogenicity. Moreover, the R346T substitution, while contributing to enhanced ACE2 affinity and augmented fusogenicity, also concomitantly contributes, perhaps unexpectedly, to immune evasion<sup>6,21</sup>.

Our previous studies focusing on Delta<sup>16</sup>, Omicron BA.1<sup>17</sup>, BA.5<sup>15</sup>, and BA.2.75<sup>2</sup>, showed that the intrinsic pathogenicity of SARS-CoV-2 variants is closely related to the fusogenicity of viral S proteins. Therefore, the observations showing the higher fusogenicity of BQ.1.1 S than the BA.5 S based on the S-based fusion assay (**Fig. 3f**) and the experiments using airway-on-a-chip (**Fig. 3m**) suggested the increased intrinsic pathogenicity of BQ.1.1 when compared to BA.5. However, it was unexpected that the intrinsic pathogenicity of BQ.1.1 in a hamster model is comparable or even lower than that of BA.5 (**Fig. 4**). This discrepancy between viral fusogenicity and viral intrinsic pathogenicity is reminiscent of the previous two studies on Omicron BA.2 variant. We first showed that the BA.2 S is more fusogenic than the BA.1 S<sup>18</sup>. We then artificially generated a BA.2 S-bearing recombinant SARS-CoV-2, in which the non-S region of viral genome is derived from ancestral SARS-CoV-2 and demonstrated that the BA.2 S-bearing virus is more pathogenic than the BA.1 S-bearing virus in hamsters<sup>18</sup>. On the other hand, Uraki et al. showed that the intrinsic pathogenicity of clinical BA.2 isolates is comparable to clinical BA.1 isolates<sup>30</sup>. Because the difference between our study<sup>18</sup> and others<sup>30</sup> is the viral genome sequence in the non-S region, it is suggested that the BA.2 S bears the potential to exhibit augmented pathogenicity when compared to the BA.1 S, whereas the mutations in non-S region of BA.2 genome potentially attenuate viral pathogenicity. In fact, we found there are at least six substitutions in the non-S region of BQ.1.1 when compared to that of BA.5. Therefore, it would be conceivable to assume that there are factors potentially modulate viral intrinsic pathogenicity other than S protein.

515           There are two evolutionary scenarios that possibly explain the  
516 discrepancy between viral fusogenicity and intrinsic pathogenicity observed in  
517 BQ.1.1. One scenario is that BQ.1.1 acquired mutation(s) in the non-S region of  
518 viral genome that can attenuate viral pathogenicity and cancel the pathogenicity  
519 elevated by the higher fusogenicity compared with the parental BA.5. This is  
520 reminiscent to the observations in the two BA.2 studies as mentioned above<sup>18,30</sup>.  
521 This scenario also provides a possibility that the increased fusogenicity of viral S  
522 protein can reduce viral fitness in the human population because greater  
523 fusogenicity can result in elevating pathogenicity. Another scenario is brought  
524 from a theoretical study by Sasaki, Lion, and Boots<sup>31</sup>. This study provides a  
525 possibility that antigenic escape can augment viral pathogenicity<sup>31</sup>. Since we  
526 demonstrated that at least two descendants of BA.2, BA.5<sup>15</sup>, and BA.2.75<sup>2</sup>,  
527 increased their intrinsic pathogenicity, this theory may fit the evolution of  
528 Omicron. More importantly, this theory also predicts that there is a limitation to  
529 increase viral pathogenicity<sup>31</sup>. Together with our observations, it might be  
530 possible to assume that the pathogenicity of Omicron lineage already reaches a  
531 plateau.

532           The emergence of SARS-CoV-2 variants with increased intrinsic  
533 pathogenicity may not be so critical for the immunized segment of the population.  
534 However, the variants bearing greater intrinsic pathogenicity can be a  
535 meaningful risk for people who do not have anti-SARS-CoV-2 immunity, most  
536 conspicuously the unvaccinated population, including children. Therefore,  
537 continued in-depth viral genomic surveillance and real-time evaluation of the risk  
538 of newly emerging SARS-CoV-2 variants should be crucial.

## 539 **Author Contributions**

540 Keiya Uriu, Sayaka Deguchi, Hesham Nasser, Maya Shofa, MST Monira Begum,  
541 Shigeru Fujita, Akatsuki Saito, Kazuo Takayama and Terumasa Ikeda  
542 performed cell culture experiments.

543 Rigel Suzuki, Yukari Itakura, Tomokazu Tamura, Izumi Kida, Kumiko  
544 Yoshimatsu, Hayato Ito, Naganori Nao, Keita Matsuno and Takasuke Fukuhara  
545 performed animal experiments.

546 Lei Wang, Masumi Tsuda, Yoshitaka Oda and Shinya Tanaka performed  
547 histopathological analysis.

548 Jiri Zahradnik and Gideon Schreiber performed yeast surface display assay.

549 Sayaka Deguchi and Kazuo Takayama prepared AO-ALI and airway-on-a-chip  
550 systems.

551 Yuki Yamamoto and Tetsuharu Nagamoto performed generation and provision  
552 of human iPSC-derived airway and alveolar epithelial cells.

553 Hiroyuki Asakura, Mami Nagashima, Kenji Sadamasu and Kazuhisa Yoshimura  
554 performed viral genome sequencing analysis.

555 Jumpei Ito and Spyros Lytras performed phylogenetic analyses.

556 Jumpei Ito performed statistical, modelling, and bioinformatics analyses.

557 Jumpei Ito, Akatsuki Saito, Keita Matsuno, Kazuo Takayama, Shinya Tanaka,  
558 Takasuke Fukuhara, Terumasa Ikeda and Kei Sato designed the experiments  
559 and interpreted the results.

560 Jumpei Ito and Kei Sato wrote the original manuscript.

561 All authors reviewed and proofread the manuscript.

562 The Genotype to Phenotype Japan (G2P-Japan) Consortium contributed to the  
563 project administration.

564

## 565 **Conflict of interest**

566 Yuki Yamamoto and Tetsuharu Nagamoto are founders and shareholders of  
567 HiLung, Inc. Yuki Yamamoto is a co-inventor of patents (PCT/JP2016/057254;  
568 "Method for inducing differentiation of alveolar epithelial cells",  
569 PCT/JP2016/059786, "Method of producing airway epithelial cells"). The other  
570 authors declare that no competing interests exist.

571

## 572 **Acknowledgments**

573 We would like to thank all members belonging to The Genotype to Phenotype  
574 Japan (G2P-Japan) Consortium. We thank Dr. Kenzo Tokunaga (National  
575 Institute for Infectious Diseases, Japan) and Dr. Jin Gohda (The University of  
576 Tokyo, Japan) for providing reagents. We also thank National Institute for  
577 Infectious Diseases, Japan for providing clinical isolates of BQ.1.1 (strain  
578 TY41-796-P1; GISAID ID: EPI\_ISL\_15579783) and BA.2 (strain TY40-385;  
579 GISAID ID: EPI\_ISL\_9595859). We appreciate the technical assistance from

580 The Research Support Center, Research Center for Human Disease Modeling,  
581 Kyushu University Graduate School of Medical Sciences. We gratefully  
582 acknowledge all data contributors, i.e. the Authors and their Originating  
583 laboratories responsible for obtaining the specimens, and their Submitting  
584 laboratories for generating the genetic sequence and metadata and sharing via  
585 the GISAID Initiative, on which this research is based. The super-computing  
586 resource was provided by Human Genome Center at The University of Tokyo.

587 This study was supported in part by AMED SCARDA Japan Initiative  
588 for World-leading Vaccine Research and Development Centers "UTOPIA"  
589 (JP223fa627001, to Kei Sato), AMED SCARDA Program on R&D of new  
590 generation vaccine including new modality application (JP223fa727002, to Kei  
591 Sato); AMED Research Program on Emerging and Re-emerging Infectious  
592 Diseases (JP21fk0108574, to Hesham Nasser; JP21fk0108465, to Akatsuki  
593 Saito; JP21fk0108493, to Takasuke Fukuhara; JP22fk0108617 to Takasuke  
594 Fukuhara; JP22fk0108146, to Kei Sato; JP21fk0108494 to G2P-Japan  
595 Consortium, Keita Matsuno, Shinya Tanaka, Terumasa Ikeda, Takasuke  
596 Fukuhara, and Kei Sato; JP21fk0108425, to Kazuo Takayama and Kei Sato;  
597 JP21fk0108432, to Kazuo Takayama, Takasuke Fukuhara and Kei Sato); AMED  
598 Research Program on HIV/AIDS (JP22fk0410033, to Akatsuki Saito;  
599 JP22fk0410047, to Akatsuki Saito; JP22fk0410055, to Terumasa Ikeda; and  
600 JP22fk0410039, to Kei Sato); AMED CRDF Global Grant (JP22jk0210039 to  
601 Akatsuki Saito); AMED Japan Program for Infectious Diseases Research and  
602 Infrastructure (JP22wm0325009, to Akatsuki Saito; JP22wm0125008 to Keita  
603 Matsuno); AMED CREST (JP21gm1610005, to Kazuo Takayama;  
604 JP22gm1610008, to Takasuke Fukuhara); JST PRESTO (JPMJPR22R1, to  
605 Jumpei Ito); JST CREST (JPMJCR20H4, to Kei Sato); JSPS KAKENHI  
606 Grant-in-Aid for Scientific Research C (22K07103, to Terumasa Ikeda); JSPS  
607 KAKENHI Grant-in-Aid for Scientific Research B (21H02736, to Takasuke  
608 Fukuhara); JSPS KAKENHI Grant-in-Aid for Early-Career Scientists (22K16375,  
609 to Hesham Nasser; 20K15767, Jumpei Ito); JSPS Core-to-Core Program (A.  
610 Advanced Research Networks) (JPJSCCA20190008, to Kei Sato); JSPS  
611 Research Fellow DC2 (22J11578, to Keiya Uriu); JSPS Leading Initiative for  
612 Excellent Young Researchers (LEADER) (to Terumasa Ikeda); World-leading  
613 Innovative and Smart Education (WISE) Program 1801 from the Ministry of  
614 Education, Culture, Sports, Science and Technology (MEXT) (to Naganori Nao);  
615 The Tokyo Biochemical Research Foundation (to Kei Sato); Takeda Science  
616 Foundation (to Terumasa Ikeda); Mochida Memorial Foundation for Medical and  
617 Pharmaceutical Research (to Terumasa Ikeda); The Naito Foundation (to  
618 Terumasa Ikeda); Shin-Nihon Foundation of Advanced Medical Research (to  
619 Terumasa Ikeda); Waksman Foundation of Japan (to Terumasa Ikeda); an  
620 intramural grant from Kumamoto University COVID-19 Research Projects

(AMABIE) (to Terumasa Ikeda); the UK's Medical Research Council (to Spyros Lytras); and the project of National Institute of Virology and Bacteriology, Programme EXCELES, funded by the European Union, Next Generation EU (LX22NPO5103, to Jiri Zahradnik).

# **Consortia**

Saori Suzuki<sup>2</sup>, Marie Kato<sup>8</sup>, Zannatul Ferdous<sup>8</sup>, Hiromi Mouri<sup>8</sup>, Kenji Shishido<sup>8</sup>, Naoko Misawa<sup>1</sup>, Izumi Kimura<sup>1</sup>, Yusuke Kosugi<sup>1</sup>, Pan Lin<sup>1</sup>, Mai Suganami<sup>1</sup>, Mika Chiba<sup>1</sup>, Ryo Yoshimura<sup>1</sup>, Kyoko Yasuda<sup>1</sup>, Keiko Iida<sup>1</sup>, Naomi Ohsumi<sup>1</sup>, Adam P. Strange<sup>1</sup>, Daniel Sauter<sup>1,30</sup>, So Nakagawa<sup>31</sup>, Jiaqi Wu<sup>31</sup>, Yukio Watanabe<sup>7</sup>, Ayaka Sakamoto<sup>7</sup>, Naoko Yasuhara<sup>7</sup>, Takao Hashiguchi<sup>32</sup>, Tateki Suzuki<sup>32</sup>, Kanako Kimura<sup>32</sup>, Jiei Sasaki<sup>32</sup>, Yukari Nakajima<sup>32</sup>, Hisano Yajima<sup>32</sup>, Kotaro Shirakawa<sup>32</sup>, Akifumi Takaori-Kondo<sup>32</sup>, Kayoko Nagata<sup>32</sup>, Yasuhiro Kazuma<sup>32</sup>, Ryosuke Nomura<sup>32</sup>, Yoshihito Horisawa<sup>32</sup>, Yusuke Tashiro<sup>32</sup>, Yugo Kawa<sup>32</sup>, Takashi Irie<sup>33</sup>, Ryoko Kawabata<sup>33</sup>, Ryo Shimizu<sup>12</sup>, Otowa Takahashi<sup>12</sup>, Kimiko Ichihara<sup>12</sup>, Chihiro Motozono<sup>34</sup>, Mako Toyoda<sup>34</sup>, Takamasa Ueno<sup>34</sup>, Yuki Shibatani<sup>14</sup>, Tomoko Nishiuchi<sup>14</sup>

<sup>30</sup>University Hospital Tübingen, Tübingen, Germany

<sup>31</sup>Tokai University School of Medicine, Isehara, Japan

<sup>32</sup>Kyoto University, Kyoto, Japan

<sup>33</sup>Hiroshima University, Hiroshima, Japan

<sup>34</sup>Kumamoto University, Kumamoto, Japan

## 644 **Figure legends**

### 645 **Fig. 1. Convergent evolution of Omicron lineages.**

646 **a**, A maximum likelihood (ML) tree of the Omicron lineages. The tree was rooted  
647 using an outgroup sequence (B.1.1). The S substitutions acquired by BA.4/BA.5,  
648 BA.2.75, and BQ.1.1 are indicated in the panel, and the five convergent  
649 substitutions are indicated in bold. Note that R493Q is a reversion. Bootstrap  
650 values, \*,  $\geq 0.85$ ; \*\*,  $\geq 0.9$ .

651 **b**, Left, amino acid differences in the S proteins of Omicron lineages. The five  
652 convergent substitutions are indicated in bold. Right, amino acid differences in  
653 the non-S proteins between BA.5 and BQ.1.1.

654 **c**, Left, time-calibrated ML trees for BA.1, BA.2, BA.4, and BA.5. The trees for  
655 BA.2 and BA.5 include BA.2.75 and BQ.1.1 lineages, respectively. Dots indicate  
656 estimated substitution events at the convergent sites. Branch color indicates the  
657 estimated number of additional substitutions at the convergent sites compared to  
658 the most recent common ancestor of each lineage. Right, the substitution profile  
659 at the convergent sites.

660 **d and e**, The number of substitution events at the convergent sites detected.  
661 Raw counts (**d**) and counts per 1 million (1M) analyzed sequences (**e**) are  
662 shown. Note that L452 and F486 in BA.4/5 are indicated in gray because BA.4/5  
663 harbors the L452R and F486V substitutions.

664 **f**, Effect size of each S substitution on  $R_e$  estimated by a hierarchical Bayesian  
665 model. Posterior mean value is shown. A group of highly co-occurred  
666 substitutions (e.g., L452R and F486V) was treated as substitution clusters. The  
667 red and blue dots indicate the substitutions with significant positive and negative  
668 effects, respectively. Representative substitutions are annotated.

669 **g**, Relative  $R_e$  value for a viral group represented by each S haplotype,  
670 assuming a fixed generation time of 2.1-day. Posterior mean value is shown.  
671 The  $R_e$  of the major S haplotype in BA.2 is set at 1. The substitution profile at the  
672 five convergent sites is shown in the left.

673 **h**, Comparison between relative  $R_e$  and the total effect of substitutions at the  
674 convergent sites on  $R_e$ . Dot indicates a viral group represented by a S haplotype.  
675 Dots are colored according to the major classification of PANGO lineage.

676 **i**, Change in viral fitness during BA.5 diversification. The lineages indicated with  
677 an asterisk, which includes BQ.1.1, are zoomed in the right panel.

### 679 **Fig. 2. Immune resistance of BQ.1.1**

680 Neutralization assays were performed with pseudoviruses harboring the S  
681 proteins of BA.2, BA.2.75, BA.5 and BQ.1.1. The BA.5 S-based derivatives are  
682 included in **a and b**. The following sera were used.

683 **a,b**, Convalescent sera from fully vaccinated individuals who had been infected  
684 with BA.2 after full vaccination (9 2-dose vaccinated and 5 3-dose vaccinated. 14

685 donors in total) (**a**), and BA.5 after full vaccination (2 2-dose vaccinated donors,  
686 17 3-dose vaccinated donors and 1 4-dose vaccinated donors. 20 donors in  
687 total) (**b**).  
688 **c**, Sera from hamsters infected with BA.2 (12 hamsters; left), BA.2.75 (12  
689 hamsters; middle), and BA.5 (12 hamsters; right).  
690 **d**, Principal component analysis to representing the antigenicity of the S proteins.  
691 The analysis is based on the results of neutralization assays using hamster sera  
692 (**Fig. 3c**).  
693 Assays for each serum sample were performed in triplicate to determine the  
694 50% neutralization titer (NT<sub>50</sub>). Each dot represents one NT<sub>50</sub> value, and the  
695 geometric mean and 95% CI are shown. Statistically significant differences were  
696 determined by two-sided Wilcoxon signed-rank tests. The *P* values versus BA.2  
697 (**a and c, left**) BA.2.75 (**c, middle**) or BA.5 (**b and c, right**) are indicated in the  
698 panels.  
699 For the BA.5 derivatives (**a and b**), statistically significant differences (*P* < 0.05)  
700 versus BA.5 are indicated with asterisks.  
701 The horizontal dashed line indicates the detection limit (120-fold). Information on  
702 the convalescent donors is summarized in **Supplementary Table 4**.

703

### 704 **Fig. 3. Virological characteristics of BQ.1.1 *in vitro***

705 **a**, Binding affinity of the RBD of SARS-CoV-2 S protein to ACE2 by yeast  
706 surface display. The K<sub>D</sub> value indicating the binding affinity of the RBD of the  
707 SARS-CoV-2 S protein to soluble ACE2 when expressed on yeast is shown.

708 **b**, Pseudovirus assay. HOS-ACE2-TMPRSS2 cells were infected with  
709 pseudoviruses bearing each S protein. The amount of input virus was  
710 normalized based on the amount of HIV-1 p24 capsid protein. The percent  
711 infectivity compared to that of the virus pseudotyped with the BA.2 S protein are  
712 shown.

713 **c**, Fold increase in pseudovirus infectivity based on TMPRSS2 expression.

714 **d–f**, S-based fusion assay. **d**, S protein expression on the cell surface. The  
715 summarized data are shown. **e,f**, S-based fusion assay in Calu-3 cells. The  
716 recorded fusion activity (arbitrary units) is shown. The dashed green line (**e**) and  
717 the dashed brown line (**f**) indicate the results of BA.2 and BA.5, respectively. The  
718 red number in each panel indicates the fold difference between BA.2 (**e**) or BA.5  
719 (**f**) and the derivative tested at 24 h post coculture.

720 **g–l**, Growth kinetics of BQ.1.1. Clinical isolates of BA.2, BA.5, BQ.1.1 and Delta  
721 (only in **m**) were inoculated into Vero cells (**g**), VeroE6/TMPRSS2 cells (**h**),  
722 Calu-3 cells (**i**), AO-ALI (**j**), iPSC-derived airway epithelial cells (**k**), iPSC-derived  
723 alveolar epithelial cells (**l**) and an airway-on-a-chip system (**m**). The copy  
724 numbers of viral RNA in the culture supernatant (**g–i**), the apical sides of  
725 cultures (**j–l**), and the top (**m, left**) and bottom (**m, middle**) channels of an

airway-on-a-chip were routinely quantified by RT-qPCR. In **m, right**, the percentage of viral RNA load in the bottom channel per top channel during 3–6 d.p.i. (i.e., % invaded virus from the top channel to the bottom channel) is shown. Assays were performed in triplicate (**a,d,m**) or quadruplicate (**b,c,e–l**). The presented data are expressed as the average  $\pm$  SD (**a–f**) or SEM (**g–m**). In **a–d**, each dot indicates the result of an individual replicate. In **a–c**, the dashed horizontal lines indicate the value of BA.5. In **a–d**, statistically significant differences (\*,  $P < 0.05$ ) versus each parental S and those between BA.5 and BQ.1.1 were determined by two-sided Student's  $t$  tests. In **e–m**, statistically significant differences versus BA.2 (**e**) and BA.5 (**f–m**) across timepoints were determined by multiple regression. The FWERs calculated using the Holm method are indicated in the figures. NA, not applicable.

#### **Fig. 4. Virological characteristics of BQ.1.1 *in vivo***

Syrian hamsters were intranasally inoculated with BA.5, BQ.1.1 and Delta. Six hamsters of the same age were intranasally inoculated with saline (uninfected). Six hamsters per group were used to routinely measure the respective parameters (**a**). Four hamsters per group were euthanized at 2 and 5 d.p.i. and used for virological and pathological analysis (**b–e**).

**a**, Body weight, Penh, and Rpef values of infected hamsters ( $n = 6$  per infection group).

**b**, (Left) Viral RNA loads in the oral swab ( $n=6$  per infection group). (Middle and right) Viral RNA loads in the lung hilum (middle) and lung periphery (right) of infected hamsters ( $n=4$  per infection group).

**c**, IHC of the viral N protein in the lungs at 2 d.p.i. (left) and 5 d.p.i. (right) of infected hamsters. Representative figures (N-positive cells are shown in brown) and the percentage of N-positive cells in whole lung lobes ( $n=4$  per infection group) are respectively shown. The raw data are shown in **Extended Data Fig. 2b**.

**d,e**, H&E staining of the lungs of infected hamsters. Representative figures are shown in **d**. Uninfected lung alveolar space and bronchioles are also shown. **e**, Histopathological scoring of lung lesions ( $n=4$  per infection group). Representative pathological features are reported in our previous studies<sup>27</sup>. In **a–c,e**, data are presented as the average  $\pm$  SEM. In **c**, each dot indicates the result of an individual hamster.

In **a,b,e**, statistically significant differences between BA.5 and other variants across timepoints were determined by multiple regression. In **a**, the 0 d.p.i. data were excluded from the analyses. The FWERs calculated using the Holm method are indicated in the figures.

In **c**, the statistically significant differences between BA.5 and other variants were determined by a two-sided Mann–Whitney  $U$  test.

In **c** and **d**, each panel shows a representative result from an individual infected hamster. Scale bars, 500  $\mu\text{m}$  (**c**); 200  $\mu\text{m}$  (**d**).

**Supplementary Table 1.** Information on the number of estimated substitution events in each Omicron lineage

**Supplementary Table 2.** Effect size of each S substitution on  $R_e$  estimated by a hierarchical Bayesian model

**Supplementary Table 3.** Relative  $R_e$  value for a viral group represented by each S haplotype

**Supplementary Table 4.** Human sera used in this study

**Supplementary Table 5.** Primers used in this study

**Supplementary Table 6.** Summary of unexpected amino acid mutations detected in the working virus stocks

**Extended Data Fig. 1. Convergent evolution of the Omicron lineages.**

**a**, Detected substitution events at the convergent sites (related to **Fig. 1d,e**). Raw counts (left) and counts per 1 million (M) analyzed sequences (right) are shown. Unlike **Fig. 1d,e**, results for BA.2.75 are shown in addition to BA.1, BA.2, BA.4, and BA.5.

**b**, The co-occurrence network of S substitutions in the Omicron lineages. In the S haplotype dataset, a pair of substitutions with Pearson's correlation  $> 0.9$  is considered co-occurring substitutions and indicated as a link in the network. In the modeling analysis, a group of co-occurring substitutions was clustered, and one effect value was estimated for each substitution cluster.

**c**, Effect size of each S substitution on  $R_e$  (related to **Fig. 1f**). A dot and line indicate the posterior mean and the 95% Bayesian confidential interval (CI), respectively.

**d**, Relative  $R_e$  value for a viral group represented by each S haplotype, assuming a fixed generation time of 2.1 days (related to **Fig. 1g**). A dot and line indicate the posterior mean and the 95% Bayesian CI, respectively. Unlike **Fig. 1g**, the profile of all S substitutions analyzed is shown on the left side.

**Extended Data Fig. 2. Histological observations in infected hamsters**

**a**, IHC of the viral N protein in the middle portion of the tracheas of all infected hamsters at 2 d.p.i (4 hamsters per infection group). Each panel shows a representative result from an individual infected hamster.

808 **b**, IHC of the SARS-CoV-2 N protein in the lungs of infected hamsters at 2 d.p.i.  
 809 (left) and 5 d.p.i (right) (4 hamsters per infection group). In each panel, IHC  
 810 staining (top) and the digitalized N-positive area (bottom, indicated in red) are  
 811 shown. The red numbers in the bottom panels indicate the percentage of the  
 812 N-positive area. Summarized data are shown in **Fig.4c**. In **a and b**, N-positive  
 813 cells are shown in brown. Scale bars, 1 mm (**a**); 5 mm (**b**).

# 814 **Methods**

815

## 816 **Ethics statement**

817 All experiments with hamsters were performed in accordance with the Science  
818 Council of Japan's Guidelines for the Proper Conduct of Animal Experiments.  
819 The protocols were approved by the Institutional Animal Care and Use  
820 Committee of National University Corporation Hokkaido University (approval ID:  
821 20-0123 and 20-0060). All protocols involving specimens from human subjects  
822 recruited at Interpark Kuramochi Clinic was reviewed and approved by the  
823 Institutional Review Board of Interpark Kuramochi Clinic (approval ID:  
824 G2021-004). All human subjects provided written informed consent. All protocols  
825 for the use of human specimens were reviewed and approved by the Institutional  
826 Review Boards of The Institute of Medical Science, The University of Tokyo  
827 (approval IDs: 2021-1-0416 and 2021-18-0617) and University of Miyazaki  
828 (approval ID: O-1021).

829

## 830 **Human serum collection**

831 Convalescent sera were collected from fully vaccinated individuals who had  
832 been infected with BA.2 (9 2-dose vaccinated and 5 3-dose vaccinated; 11–61  
833 days after testing. n=14 in total; average age: 47 years, range: 24–84 years,  
834 64% male) (**Fig. 2a**), and fully vaccinated individuals who had been infected with  
835 BA.5 (2 2-dose vaccinated, 17 3-dose vaccinated and 1 4-dose vaccinated;  
836 10–23 days after testing. n=20 in total; average age: 51 years, range: 25–73  
837 years, 45% male) (**Fig. 2b**). The SARS-CoV-2 variants were identified as  
838 previously described<sup>2,15,18</sup>. Sera were inactivated at 56°C for 30 minutes and  
839 stored at –80°C until use. The details of the convalescent sera are summarized  
840 in **Supplementary Table 4**.

841

## 842 **Cell culture**

843 HEK293T cells (a human embryonic kidney cell line; ATCC, CRL-3216),  
844 HEK293 cells (a human embryonic kidney cell line; ATCC, CRL-1573) and  
845 HOS-ACE2/TMPRSS2 cells (HOS cells stably expressing human ACE2 and  
846 TMPRSS2)<sup>32,33</sup> were maintained in DMEM (high glucose) (Sigma-Aldrich, Cat#  
847 6429-500ML) containing 10% fetal bovine serum (FBS, Sigma-Aldrich Cat#  
848 172012-500ML) and 1% penicillin–streptomycin (PS) (Sigma-Aldrich, Cat#  
849 P4333-100ML). HEK293-ACE2 cells (HEK293 cells stably expressing human  
850 ACE2)<sup>19</sup> were maintained in DMEM (high glucose) containing 10% FBS, 1 µg/ml  
851 puromycin (InvivoGen, Cat# ant-pr-1) and 1% PS. HEK293-ACE2/TMPRSS2  
852 cells (HEK293 cells stably expressing human ACE2 and TMPRSS2)<sup>19</sup> were  
853 maintained in DMEM (high glucose) containing 10% FBS, 1 µg/ml puromycin,  
854 200 µg/ml hygromycin (Nacalai Tesque, Cat# 09287-84) and 1% PS. Vero cells

[an African green monkey (*Chlorocebus sabaeus*) kidney cell line; JCRB Cell Bank, JCRB0111] were maintained in Eagle's minimum essential medium (EMEM) (Sigma-Aldrich, Cat# M4655-500ML) containing 10% FBS and 1% PS. VeroE6/TMPRSS2 cells (VeroE6 cells stably expressing human TMPRSS2; JCRB Cell Bank, JCRB1819)<sup>34</sup> were maintained in DMEM (low glucose) (Wako, Cat# 041-29775) containing 10% FBS, G418 (1 mg/ml; Nacalai Tesque, Cat# G8168-10ML) and 1% PS. Calu-3 cells (ATCC, HTB-55) were maintained in Eagle's minimum essential medium (EMEM) (Sigma-Aldrich, Cat# M4655-500ML) containing 10% FBS and 1% PS. Calu-3/DSP<sub>1-7</sub> cells (Calu-3 cells stably expressing DSP<sub>1-7</sub>)<sup>35</sup> were maintained in EMEM (Wako, Cat# 056-08385) containing 20% FBS and 1% PS. Human airway and lung epithelial cells derived from human induced pluripotent stem cells (iPSCs) were manufactured according to established protocols as described below (see "Preparation of human airway and lung epithelial cells from human iPSCs" section) and provided by HiLung Inc. AO-ALI model was generated according to established protocols as described below (see "AO-ALI model" section).

871

## 872 **Viral genome sequencing**

873 Viral genome sequencing was performed as previously described<sup>15</sup>. Briefly, the  
874 virus sequences were verified by viral RNA-sequencing analysis. Viral RNA was  
875 extracted using a QIAamp viral RNA mini kit (Qiagen, Cat# 52906). The  
876 sequencing library employed for total RNA sequencing was prepared using the  
877 NEBNext Ultra RNA Library Prep Kit for Illumina (New England Biolabs, Cat#  
878 E7530). Paired-end 76-bp sequencing was performed using a MiSeq system  
879 (Illumina) with MiSeq reagent kit v3 (Illumina, Cat# MS-102-3001). Sequencing  
880 reads were trimmed using fastp v0.21.0<sup>36</sup> and subsequently mapped to the viral  
881 genome sequences of a lineage B isolate (strain Wuhan-Hu-1; GenBank  
882 accession number: NC\_045512.2)<sup>34</sup> using BWA-MEM v0.7.17<sup>37</sup>. Variant calling,  
883 filtering, and annotation were performed using SAMtools v1.9<sup>38</sup> and snpEff  
884 v5.0e<sup>39</sup>.

885

## 886 **Phylogenetic reconstruction**

887 A total of 5,345,749 SARS-CoV-2 genome sequences labelled as 'Omicron' and  
888 their corresponding metadata were retrieved from the GISAID database on  
889 October 3, 2022 (<https://www.gisaid.org/>)<sup>40</sup>. The dataset was then filtered based  
890 on the following criteria: i) only 'original passage' sequences, ii) collection date in  
891 2022, iii) host labelled as 'Human', iv) sequence length above 28,000 base pairs  
892 and v) proportion of ambiguous bases below 2%. This filtering reduced the  
893 dataset to a total of 3,840,308 sequences. To ensure that PANGO lineage  
894 definitions in our dataset's metadata included the latest circulating lineages, the

895 GISAID metadata were downloaded again on October 15<sup>th</sup>, 2022, and PANGO  
896 lineages of our sequences were updated accordingly.

897 To construct an ML tree of Omicron lineages (**Fig. 1a**), we randomly  
898 sampled 100 sequences from BA.1, BA.2, BA.4, and BA.5 and 20 sequences  
899 from BA.2.75 and BQ.1.1. In addition, an outgroup sequence, EPI\_ISL\_466615,  
900 representing the oldest isolate of B.1.1 obtained in the UK was added to the  
901 dataset. The viral genome sequences were mapped to the reference sequence  
902 of Wuhan-Hu-1 (GenBank accession number: NC\_045512.2) using Minimap2  
903 v2.17<sup>41</sup> and subsequently converted to a multiple sequence alignment according  
904 to the GISAID phylogenetic analysis pipeline  
905 (<https://github.com/roblanf/sarscov2phylo>). The alignment sites corresponding to  
906 the 1–265 and 29674–29903 positions in the reference genome were masked  
907 (i.e., converted to NNN). Alignment sites at which >50% of sequences contained  
908 a gap or undetermined/ambiguous nucleotide were trimmed using trimAl v1.2<sup>42</sup>.  
909 Phylogenetic tree construction was performed via a three-step protocol: i) the  
910 first tree was constructed; ii) tips with longer external branches (Z score > 4)  
911 were removed from the dataset; iii) and the final tree was constructed. Tree  
912 reconstruction was performed by RAxML v8.2.12<sup>43</sup> under the GTRCAT  
913 substitution model. The node support value was calculated by 100 times  
914 bootstrap analysis.

915 A separate phylogenetic tree was reconstructed for each Omicron  
916 lineage (BA.1, BA.2, BA.4 and BA.5) including all their descendant sublineages  
917 (**Fig. 1c**). To remove redundant sequences and reduce the volume of data for  
918 each reconstruction, a representative subsampling approach was used. 3,000  
919 sequences from each Omicron lineage that had no substitutions at the  
920 convergent sites in S: 346, 444, 452, 460 and 486 for BA.1 and BA.2 or no  
921 substitutions in sites 346, 444 and 460 for BA.4 and BA.5 were randomly  
922 sampled from each dataset, weighting the sampling by the frequency of each  
923 PANGO lineage in the dataset. In this way we included a sample of background  
924 sequences with no ‘additional’ substitutions in the sites of interest with PANGO  
925 lineage frequencies representative of the full dataset. It was also ensured that  
926 the selected sequences had no ambiguous bases in the S gene (checked  
927 between sequence positions 21,000 to 26,000) to avoid ambiguous residues in  
928 the sites of interest. Recombinant PANGO lineages were excluded from the  
929 analysis.

930 After collecting the subsampled set of background sequences for each  
931 lineage, a maximum of 30 randomly selected sequences of each PANGO  
932 sublineage with at least one additional substitution at the convergent sites were  
933 added to the dataset. This subsampling approach aimed to capture sequences  
934 of all sublineages that have acquired additional mutations at the convergent  
935 sites, while maintaining a large set of background lineages that reflects

936 circulating lineage distribution. One SARS-CoV-2 sequence from the sister  
937 lineage of each set with a recent collection date was also added to each dataset  
938 to be used as an outgroup of the phylogeny [for the BA.1 tree,  
939 EPI\_ISL\_15170885 (BA.2); for the BA.2 tree, EPI\_ISL\_15148193 (BA.1); for the  
940 BA.4 tree, EPI\_ISL\_15192101 (BA.5); and for BA.5 the tree, EPI\_ISL\_15174939  
941 (BA.4)].

942 Each lineage sequence dataset was aligned using the  
943 'global\_profile\_alignment.sh' from the SARS-CoV-2 global phylogeny pipeline  
944 [[www.doi.org/10.5281/zenodo.3958883](https://www.doi.org/10.5281/zenodo.3958883)], utilising MAFFT<sup>44</sup>. Phylogenies were  
945 reconstructed using iqtree2 (v2.1.3)<sup>45</sup> under a GTR+I+F+G4 model with 1000  
946 ultrafast bootstrap replicates to determine node support. Trees were manually  
947 rerooted on the branch leading to the outgroup sequence and time-calibrated  
948 with TreeTime<sup>46</sup> (with the '--keep-root' option to preserve the outgroup rooting).  
949 Branches leading to tips with dates not matching the root-to-tip regression model  
950 were removed from the phylogeny using the ete3 python package<sup>47</sup>. The final  
951 trees for BA.1, BA.2, BA.4 and BA.5 contain 3,901, 5,343, 3,328, and 5,197  
952 sequences, respectively.

953

#### 954 **Ancestral node reconstruction of site substitutions**

955 To infer the branches where substitution events occurred at the five convergent  
956 sites (positioned at 346, 444, 452, 460, 486) in the trees of Omicron lineages, we  
957 reconstructed the ancestral state of the substitution profile at the convergent  
958 sites in each node using a parsimony method, implemented by the phangorn  
959 package (<https://github.com/KlausVigo/phangorn>). Internal nodes with  
960 substitution probabilities above or equal to 0.5 were annotated as having the  
961 substitution. Branches where substitutions took place for each site were denoted  
962 as branches connecting an ancestral internal node with no substitution to an  
963 internal node that has a substitution. Additionally, 70% of tips descending from  
964 that internal node were also required to have the substitution and at least 3 tips  
965 needed to be descended from the node, to avoid picking up branches with low  
966 support or clades that reverted back to the original residue. The analysis was  
967 performed on R v4.1.2 (<https://www.r-project.org/>).

968

#### 969 **Modeling the relationship between viral epidemic dynamics and S** 970 **substitutions**

971 Motivated by the model established by Obermeyer et al<sup>48</sup>, we developed a  
972 method to model the relationship between viral epidemic dynamics and S  
973 substitutions. This model can simultaneously estimate i) the effect of each S  
974 substitution on  $R_e$  and ii) the relative  $R_e$  of a viral group represented by each S  
975 haplotype. The key concept of the model used in this study is the same as the  
976 one in Obermeyer et al<sup>48</sup>. However, our method is independent of the predefined

viral classification such as PANGO lineage but based on the viral classification according to the profile of S substitutions. Therefore, our method can link the effect of S substitutions to viral epidemic dynamics in a more direct manner. Also, in our method, a Markov Chain Monte Carlo (MCMC) method is used for parameter estimation instead of variational inference, an approximation method.

The data used in this analysis were downloaded from the GISAID database (<https://www.gisaid.org/>) on November 7, 2022. For quality control, we excluded the data of viral sequences with the following features from the analysis: i) a lack of collection date information; ii) sampling in animals other than humans; iii) >1% undetermined nucleotide characters; or iv) sampling by quarantine. Furthermore, in this analysis, we analyzed viral sequences of the Omicron lineages collected in the UK from March 1, 2022, to October 15<sup>th</sup>, 2022.

We selected S substitutions (including insertions and deletions) to be analyzed and classified Omicron sequences into S haplotypes according to the profile of the selected S substitutions: We analyzed S substitutions observed in  $\geq 200$  sequences in the dataset we used. We excluded S substitutions commonly ( $\geq 90\%$ ) detected in sequences analyzed. According to the criteria above, 123 S substitutions were retrieved. Subsequently, we classified the sequences according to the profile of S substitutions above (referred to as S haplotype). We excluded S haplotypes with  $\leq 30$  sequences from the downstream analyses. According to the criterion above, 254 S haplotypes, composed of 375,121 sequences, were retrieved. The substitution profile was represented as a matrix, where the rows and columns depict S haplotypes and S substitutions, respectively. An element in the matrix represents the status [presence (1) or absence (0)] of one S substitution in one S haplotype. Next, we identified a group of highly co-occurring substitutions (i.e., a pair of substitutions with  $>0.9$  Pearson's correlation in the substitution profile matrix) and clustered these substitutions as a substitution cluster (**Extended Data Fig. 1b**). For example, the L452R:F486V cluster represents the L452R and F486V substitutions. For one substitution cluster, the mean value of the substitution statuses (0 or 1) of the members of substitutions was calculated for each S haplotype, and the mean value was used as the substitution status of the substitution cluster. For example, if one S haplotype has L452R but not F486V, the substitution status of the L452R:F486V cluster of the haplotype was set at 0.5. Consequently, our dataset included the profile of 107 S substitutions/substitution clusters for 254 S haplotypes. Next, to set the major S haplotype of BA.2 as the reference S haplotype (or lineage) in the statistical model described below, we transformed the S substitution profile matrix by subtracting the substitution profile of the major S haplotype of BA.2 from those for all S haplotypes. Consequently, elements in the transformed S substitution profile matrix were converted to -1, 0, or 1: The zero value means that the status of a substitution in one haplotype is the same

1018 as that in the reference haplotype. The one value means that a substitution is  
1019 present in one haplotype but not in the reference haplotype. The minus one  
1020 value means that a substitution is absent in one haplotype but present in the  
1021 reference haplotype. As a consequence of the transformation, the relative  $R_e$   
1022 value for the reference haplotype was set at 1 in the parameter estimation in the  
1023 statistical model described below. Finally, the number of viral sequences  
1024 belonging to each S haplotype collected on each day was counted, and the  
1025 count matrix was constructed as an input for the statistical model described  
1026 below.

1027 We assigned one major lineage classification (i.e., BA.1 BA.2, BA.4,  
1028 BA.5, and BA.2.75) to each S haplotype: We examined the major lineage  
1029 classification of respective viral sequences belonging to one S haplotype, and  
1030 the classification of the S haplotype was determined according to the majority  
1031 vote system.

1032 We constructed a Bayesian hierarchal model, which represents the  
1033 epidemic dynamics of each S haplotype according to growth rate parameters for  
1034 each S haplotype, which is represented by a linear combination of the effect of S  
1035 substitutions. Arrays in the model index over one or more indices:  $L = 254$  viral  
1036 lineages (i.e., S haplotypes)  $l$ ;  $S = 107$  substitutions/substitution clusters  $s$ ; and  
1037  $T = 229$  days  $t$ . The model is:

$$\begin{aligned}\sigma_1 &\sim Student\_t^+(5,0,10) \\ f_m &\sim Laplace(0,10) \\ \beta_l &\sim Student\_t\left(5, \sum_m f_m X_{lm}, \sigma_1\right) \\ y_t &\sim Multinomial\left(\sum_l y_{lt}, softmax(\alpha + \beta.t)\right)\end{aligned}$$

1038 The count of viral lineage  $l$  at time  $t$ ,  $y_{lt}$ , is modeled as a hierarchal  
1039 Multinomial logistic regression with intercept  $\alpha_l$  and slope  $\beta_l$  parameters for  
1040 lineage  $l$ . The slope (or viral lineage growth) parameter  $\beta_l$  is generated from  
1041 Student's t distribution with five degrees of freedom, the mean value represented  
1042 by  $f_m X_{lm}$ , and standard deviation,  $\sigma_1$ .  $f_m X_{lm}$  denotes the linear combination of  
1043 the effect of each substitution, where  $f_m$  and  $X_{lm}$  are the effect of substitution  
1044  $m$  and the profile of substitution  $m$  in lineage  $l$  (i.e., the substitution profile  
1045 matrix constructed in the above paragraph), respectively. As a prior of  $f_m$ , the  
1046 Laplace distribution with the mean 0 and the standard deviation 10 was set. In  
1047 other words, we estimated the parameter  $f_m$  in the framework of Bayesian least  
1048 absolute shrinkage and selection operator (LASSO). As a prior of  $\sigma_1$ , a half  
1049 Student's t distribution with the mean 0 and the standard deviation 10 was set.  
1050 For the other parameters, non-informative priors were set.

1051 The relative  $R_e$  of each viral lineage,  $r_l$ , was calculated according to the  
1052 slope parameter  $\beta_l$  as:

$$r_l = \exp(\gamma \beta_l)$$

1053 where  $\gamma$  is the average viral generation time (2.1 days)  
1054 ([http://sonorouschocolate.com/covid19/index.php?title=Estimating\\_Generation\\_](http://sonorouschocolate.com/covid19/index.php?title=Estimating_Generation_Time_Of_Omicron)  
1055 [Time\\_Of\\_Omicron](http://sonorouschocolate.com/covid19/index.php?title=Estimating_Generation_Time_Of_Omicron)). Similarly, the effect size of substitution  $m$  on the relative  $R_e$ ,  
1056  $F_l$ , was calculated according to the coefficient  $f_l$  as:

$$F_l = \exp(\gamma f_l)$$

1057 Parameter estimation was performed via the MCMC approach  
1058 implemented in CmdStan v2.30.1 (<https://mc-stan.org>) with CmdStanr v0.5.3  
1059 (<https://mc-stan.org/cmdstanr/>). Four independent MCMC chains were run with  
1060 500 and 2,000 steps in the warmup and sampling iterations, respectively. We  
1061 confirmed that all estimated parameters showed <1.01 R-hat convergence  
1062 diagnostic values and >200 effective sampling size values, indicating that the  
1063 MCMC runs were successfully convergent. The above analyses were performed  
1064 in R v4.2.1 (<https://www.r-project.org/>). Information on the estimated effect size  
1065 of each substitution or substitution cluster on relative  $R_e$  and relative  $R_e$  for each  
1066 S haplotype are summarized in **Supplementary Table 2,3**.

1067 Since our model simply represents the viral lineage growth parameter  
1068 ( $\beta_l$ ) as the linear combination of the effects of S substitutions, the model can  
1069 predict the total effect of a set of substations on relative  $R_e$ . Using this property  
1070 of the model, we predicted the total effect of substitutions at the convergent sites  
1071 (**Fig. 1h**) and the ancestral relative viral fitness for each node in the BA.5 tree  
1072 (**Fig. 1i**). We calculated these values as the sum of the posterior means of the  
1073 effects of substitutions of interest. To reconstruct the ancestral relative viral  
1074 fitness of each node of the BA.5 tree, we first reconstructed the ancestral state of  
1075 the S substitution profile in each node of the tree using a parsimony method,  
1076 implemented by the phangorn package. Subsequently, we predicted the relative  
1077 viral fitness for each node according to the reconstructed ancestral mutation  
1078 profile for the node. The above analyses were performed in R v4.2.1  
1079 (<https://www.r-project.org/>).

1080

## 1081 **Plasmid construction**

1082 Plasmids expressing the codon-optimized SARS-CoV-2 S proteins of B.1.1 (the  
1083 parental D614G-bearing variant), BA.2 and BA.5, and BA.2.75 were prepared in  
1084 our previous studies<sup>27</sup>. Plasmids expressing the codon-optimized S proteins of  
1085 BQ.1.1, BA.5 S-based derivatives and BA.2 S-based derivatives were generated  
1086 by site-directed overlap extension PCR using the primers listed in  
1087 **Supplementary Table 5**. The resulting PCR fragment was digested with KpnI  
1088 (New England Biolabs, Cat# R0142S) and NotI (New England Biolabs, Cat#  
1089 R1089S) and inserted into the corresponding site of the pCAGGS vector<sup>49</sup>.

1090 Nucleotide sequences were determined by DNA sequencing services (Eurofins),  
1091 and the sequence data were analyzed by Sequencher v5.1 software (Gene  
1092 Codes Corporation). Plasmids for yeast surface display were constructed by  
1093 restriction enzyme-free cloning by incorporation of RBD genes ["construct 3" in  
1094 ref.<sup>23</sup>, covering residues 330–528] into the pJYDC1 plasmid (Addgene, Cat#  
1095 162458). The primers are listed in **Supplementary Table 6**. The non-mutated  
1096 RBD genes (BA.2, BA.5, and BQ.1) were purchased from Twist Biosciences.

1097

### 1098 **Neutralization assay**

1099 Pseudoviruses were prepared as previously described<sup>2,15,18,19,24,33,50-52</sup>. Briefly,  
1100 lentivirus (HIV-1)-based, luciferase-expressing reporter viruses were  
1101 pseudotyped with SARS-CoV-2 S proteins. HEK293T cells (1,000,000 cells)  
1102 were cotransfected with 1 µg psPAX2-IN/HiBiT<sup>32</sup>, 1 µg pWPI-Luc2<sup>32</sup>, and 500 ng  
1103 plasmids expressing parental S or its derivatives using PEI Max (Polysciences,  
1104 Cat# 24765-1) according to the manufacturer's protocol. Two days  
1105 posttransfection, the culture supernatants were harvested and centrifuged. The  
1106 pseudoviruses were stored at –80°C until use.

1107 The neutralization assay (**Fig. 2**) was prepared as previously  
1108 described<sup>2,15,18,24,33,50-52</sup>. Briefly, the SARS-CoV-2 S pseudoviruses (counting  
1109 ~20,000 relative light units) were incubated with serially diluted (120-fold to  
1110 87,480-fold dilution at the final concentration) heat-inactivated sera at 37°C for 1  
1111 hour. Pseudoviruses without sera were included as controls. Then, a 40 µl  
1112 mixture of pseudovirus and serum/antibody was added to  
1113 HOS-ACE2/TMPRSS2 cells (10,000 cells/50 µl) in a 96-well white plate. At 2  
1114 d.p.i., the infected cells were lysed with a One-Glo luciferase assay system  
1115 (Promega, Cat# E6130), a Bright-Glo luciferase assay system (Promega, Cat#  
1116 E2650), or a britelite plus Reporter Gene Assay System (PerkinElmer, Cat#  
1117 6066769), and the luminescent signal was measured using a GloMax explorer  
1118 multimode microplate reader 3500 (Promega) or CentroXS3 (Berthold  
1119 Technologies). The assay of each serum sample was performed in triplicate,  
1120 and the 50% neutralization titer (NT<sub>50</sub>) was calculated using Prism 9 software  
1121 v9.1.1 (GraphPad Software).

1122

### 1123 **SARS-CoV-2 preparation and titration**

1124 The working virus stocks of SARS-CoV-2 were prepared and titrated as  
1125 previously described<sup>15,18,19,53</sup>. In this study, clinical isolates of B.1.1 (strain  
1126 TKYE610670; GISAID ID: EPI\_ISL\_479681)<sup>17</sup>, Delta (B.1.617.2, strain  
1127 TKYTK1734; GISAID ID: EPI\_ISL\_2378732)<sup>16</sup>, BA.2 (strain TY40-385; GISAID  
1128 ID: EPI\_ISL\_9595859)<sup>15</sup> and BA.5 (strain TKYS14631; GISAID ID:  
1129 EPI\_ISL\_12812500)<sup>2,54</sup>, and BQ.1.1 (strain TY41-796-P1; GISAID ID:  
1130 EPI\_ISL\_15579783) were used. In brief, 20 µl of the seed virus was inoculated

1131 into VeroE6/TMPRSS2 cells (5,000,000 cells in a T-75 flask). One h.p.i., the  
1132 culture medium was replaced with DMEM (low glucose) (Wako, Cat#  
1133 041-29775) containing 2% FBS and 1% PS. At 3 d.p.i., the culture medium was  
1134 harvested and centrifuged, and the supernatants were collected as the working  
1135 virus stock.

1136 The titer of the prepared working virus was measured as the 50%  
1137 tissue culture infectious dose (TCID<sub>50</sub>). Briefly, one day before infection,  
1138 VeroE6/TMPRSS2 cells (10,000 cells) were seeded into a 96-well plate. Serially  
1139 diluted virus stocks were inoculated into the cells and incubated at 37°C for 4  
1140 days. The cells were observed under a microscope to judge the CPE  
1141 appearance. The value of TCID<sub>50</sub>/ml was calculated with the Reed–Muench  
1142 method<sup>55</sup>.

1143 For verification of the sequences of SARS-CoV-2 working viruses, viral  
1144 RNA was extracted from the working viruses using a QIAamp viral RNA mini kit  
1145 (Qiagen, Cat# 52906) and viral genome sequences were analyzed as described  
1146 above (see "Viral genome sequencing" section). Information on the unexpected  
1147 substitutions detected is summarized in **Supplementary Table 6**, and the raw  
1148 data are deposited in the GitHub repository  
1149 (<https://github.com/TheSatoLab/BQ.1>).

1150

### 1151 **Yeast surface display**

1152 Yeast surface display (**Fig. 3a**) was performed as previously described<sup>2,22,23</sup>.  
1153 Briefly, the *S. cerevisiae* EBY100 yeasts were transformed with RBD expression  
1154 plasmid and grown (220 rpm, 30°C, SD-CAA media). The expression media 1/9  
1155 (ref.<sup>56</sup>) was inoculated to starting OD<sub>600</sub> 0.7–1 by overnight grown culture and  
1156 cultivated for 24 hours at 20°C. The expression media was supplemented with  
1157 10 nM DMSO solubilized bilirubin (Sigma-Aldrich, Cat# 14370-1G) for activation  
1158 of eUnaG2 fluorescence (excitation at 498 nm, emission at 527 nm).

1159 Yeast cells were washed in ice-cold PBSB buffer (PBS with 1 mg/ml  
1160 BSA), liquated (100 µl), transferred in an analysis solution and incubated for 8  
1161 hours. The analysis solutions consisted of a series of CF®640R succinimidyl  
1162 ester labeled (Biotium, Cat# 92108) ACE2 peptidase domain (residues 18–740)  
1163 concentrations, PBSB buffer and 1 nM bilirubin. Incubated samples were  
1164 washed twice with PBSB buffer and transferred into a 96-well plate (Thermo  
1165 Fisher Scientific, Cat# 268200) for automated data acquisition by a CytoFLEX S  
1166 Flow Cytometer (Beckman Coulter, USA, Cat#. N0-V4-B2-Y4). The gating and  
1167 analysis strategies were described previously<sup>23</sup>. The titration curves were fitted  
1168 with nonlinear least-squares regression using Python v3.7 and two additional  
1169 parameters to describe the titration curve<sup>23</sup>.

1170

### 1171 **Pseudovirus infection**

Pseudovirus infection (**Fig. 3b**) was performed as previously described<sup>2,15,18,19,24,33,50-52</sup>. Briefly, the amount of pseudoviruses prepared was quantified by the HiBiT assay using a Nano Glo HiBiT lytic detection system (Promega, Cat# N3040) as previously described<sup>32,57</sup>. For measurement of pseudovirus infectivity, the same amount of pseudoviruses (normalized to the HiBiT value, which indicates the amount of HIV-1 p24 antigen) was inoculated into HOS-ACE2/TMPRSS2 cells, HEK293-ACE2 cells or HEK293-ACE2/TMPRSS2 cells and viral infectivity was measured as described above (see “Neutralization assay” section). For analysis of the effect of TMPRSS2 on pseudovirus infectivity (**Fig. 3c**), the fold change of the values of HEK293-ACE2/TMPRSS2 to HEK293-ACE2 was calculated.

1183

# **SARS-CoV-2 S-based fusion assay**

A SARS-CoV-2 S-based fusion assay (**Fig. 3d–f**) was performed as previously described<sup>2,15-19,25,53</sup>. Briefly, on day 1, effector cells (i.e., S-expressing cells) and target cells (Calu-3/DSP<sub>1-7</sub> cells) were prepared at a density of  $0.6\text{--}0.8 \times 10^6$  cells in a 6-well plate. On day 2, for the preparation of effector cells, HEK293 cells were cotransfected with the S expression plasmids (400 ng) and pDSP<sub>8-11</sub> (ref.<sup>58</sup>) (400 ng) using TransIT-LT1 (Takara, Cat# MIR2300). On day 3 (24 hours posttransfection), 16,000 effector cells were detached and reseeded into a 96-well black plate (PerkinElmer, Cat# 6005225), and target cells were reseeded at a density of 1,000,000 cells/2 ml/well in 6-well plates. On day 4 (48 hours posttransfection), target cells were incubated with EnduRen live cell substrate (Promega, Cat# E6481) for 3 hours and then detached, and 32,000 target cells were added to a 96-well plate with effector cells. *Renilla* luciferase activity was measured at the indicated time points using Centro XS3 LB960 (Berthold Technologies). For measurement of the surface expression level of the S protein, effector cells were stained with rabbit anti-SARS-CoV-2 S S1/S2 polyclonal antibody (Thermo Fisher Scientific, Cat# PA5-112048, 1:100). Normal rabbit IgG (Southern Biotech, Cat# 0111-01, 1:100) was used as a negative control, and APC-conjugated goat anti-rabbit IgG polyclonal antibody (Jackson ImmunoResearch, Cat# 111-136-144, 1:50) was used as a secondary antibody. The surface expression level of S proteins (**Fig. 3d**) was measured using a FACS Canto II (BD Biosciences) and the data were analyzed using FlowJo software v10.7.1 (BD Biosciences). For calculation of fusion activity, *Renilla* luciferase activity was normalized to the MFI of surface S proteins. The normalized value (i.e., *Renilla* luciferase activity per the surface S MFI) is shown as fusion activity.

1210

# **AO-ALI model**

1211

1212 An airway organoid (AO) model was generated according to our previous  
1213 report<sup>2,59</sup>. Briefly, normal human bronchial epithelial cells (NHBEs, Cat#  
1214 CC-2540, Lonza) were used to generate AOs. NHBEs were suspended in 10  
1215 mg/ml cold Matrigel growth factor reduced basement membrane matrix (Corning,  
1216 Cat# 354230). Fifty microliters of cell suspension were solidified on prewarmed  
1217 cell culture-treated multiple dishes (24-well plates; Thermo Fisher Scientific,  
1218 Cat# 142475) at 37°C for 10 min, and then, 500 µl of expansion medium was  
1219 added to each well. AOs were cultured with AO expansion medium for 10 days.  
1220 For maturation of the AOs, expanded AOs were cultured with AO differentiation  
1221 medium for 5 days.

1222 The AO-ALI model (**Fig. 3j**) was generated according to our previous  
1223 report<sup>2,59</sup>. For generation of AO-ALI, expanding AOs were dissociated into single  
1224 cells, and then were seeded into Transwell inserts (Corning, Cat# 3413) in a  
1225 24-well plate. AO-ALI was cultured with AO differentiation medium for 5 days to  
1226 promote their maturation. AO-ALI was infected with SARS-CoV-2 from the apical  
1227 side.

1228

## 1229 **Preparation of human airway and alveolar epithelial cells from human** 1230 **iPSCs**

1231 The air-liquid interface culture of airway and alveolar epithelial cells (**Fig. 3k,l**)  
1232 was differentiated from human iPSC-derived lung progenitor cells as previously  
1233 described<sup>2,15,54,60-62</sup>. Briefly, alveolar progenitor cells were induced stepwise from  
1234 human iPSCs according to a 21-day and 4-step protocol<sup>60</sup>. At day 21, alveolar  
1235 progenitor cells were isolated with the specific surface antigen carboxypeptidase  
1236 M and seeded onto the upper chamber of a 24-well Cell Culture Insert (Falcon,  
1237 #353104), followed by 28-day and 7-day differentiation of airway and alveolar  
1238 epithelial cells, respectively. Alveolar differentiation medium with  
1239 dexamethasone (Sigma-Aldrich, Cat# D4902), KGF (PeproTech, Cat# 100-19),  
1240 8-Br-cAMP (Biolog, Cat# B007), 3-isobutyl 1-methylxanthine (IBMX) (Fujifilm  
1241 Wako, Cat# 095-03413), CHIR99021 (Axon Medchem, Cat# 1386), and  
1242 SB431542 (Fujifilm Wako, Cat# 198-16543) was used for the induction of  
1243 alveolar epithelial cells. PneumaCult ALI (STEMCELL Technologies, Cat#  
1244 ST-05001) with heparin (Nacalai Tesque, Cat# 17513-96) and Y-27632 (LC  
1245 Laboratories, Cat# Y-5301) hydrocortisone (Sigma-Aldrich, Cat# H0135) was  
1246 used for induction of airway epithelial cells.

1247

## 1248 **Airway-on-a-chips**

1249 Airway-on-a-chips (**Fig. 3m**) were prepared as previously described<sup>2,26,54</sup>.  
1250 Human lung microvascular endothelial cells (HMVEC-L) were obtained from  
1251 Lonza (Cat# CC-2527) and cultured with EGM-2-MV medium (Lonza, Cat#  
1252 CC-3202). For preparation of the airway-on-a-chip, first, the bottom channel of a

polydimethylsiloxane (PDMS) device was precoated with fibronectin (3 µg/ml, Sigma-Aldrich, Cat# F1141). The microfluidic device was generated according to our previous report<sup>63</sup>. HMVEC-L cells were suspended at 5,000,000 cells/ml in EGM2-MV medium. Then, 10 µl of suspension medium was injected into the fibronectin-coated bottom channel of the PDMS device. Then, the PDMS device was turned upside down and incubated. After 1 hour, the device was turned over, and the EGM2-MV medium was added into the bottom channel. After 4 days, AOs were dissociated and seeded into the top channel. AOs were generated according to our previous report<sup>59</sup>. AOs were dissociated into single cells and then suspended at 5,000,000 cells/ml in the AO differentiation medium. Ten microliter suspension medium was injected into the top channel. After 1 hour, the AO differentiation medium was added to the top channel. In the infection experiments (**Fig. 3m**), the AO differentiation medium containing either BA.2, BA.5, BQ.1.1 or Delta isolate (500 TCID<sub>50</sub>) was inoculated into the top channel. At 2 h.p.i., the top and bottom channels were washed and cultured with AO differentiation and EGM2-MV medium, respectively. The culture supernatants were collected, and viral RNA was quantified using RT-qPCR (see “RT-qPCR” section above).

1271

## 1272 **Microfluidic device**

A microfluidic device was generated according to our previous report<sup>2,63</sup>. Briefly, the microfluidic device consisted of two layers of microchannels separated by a semipermeable membrane. The microchannel layers were fabricated from PDMS using a soft lithographic method. PDMS prepolymer (Dow Corning, Cat# SYLGARD 184) at a base to curing agent ratio of 10:1 was cast against a mold composed of SU-8 2150 (MicroChem, Cat# SU-8 2150) patterns formed on a silicon wafer. The cross-sectional size of the microchannels was 1 mm in width and 330 µm in height. Access holes were punched through the PDMS using a 6-mm biopsy punch (Kai Corporation, Cat# BP-L60K) to introduce solutions into the microchannels. Two PDMS layers were bonded to a PET membrane containing 3.0-µm pores (Falcon, Cat# 353091) using a thin layer of liquid PDMS prepolymer as the mortar. PDMS prepolymer was spin-coated (4000 rpm for 60 sec) onto a glass slide. Subsequently, both the top and bottom channel layers were placed on the glass slide to transfer the thin layer of PDMS prepolymer onto the embossed PDMS surfaces. The membrane was then placed onto the bottom layer and sandwiched with the top layer. The combined layers were left at room temperature for 1 day to remove air bubbles and then placed in an oven at 60°C overnight to cure the PDMS glue. The PDMS devices were sterilized by placing them under UV light for 1 hour before the cell culture.

1292

## 1293 **SARS-CoV-2 infection**

One day before infection, Vero cells (10,000 cells), VeroE6/TMPRSS2 cells (10,000 cells) and Calu-3 cells (10,000 cells) were seeded into a 96-well plate. SARS-CoV-2 [1,000 TCID<sub>50</sub> for Vero cells (**Fig. 3g**); 100 TCID<sub>50</sub> for VeroE6/TMPRSS2 cells (**Fig. 3h**) and Calu-3 cells (**Fig. 3i**)] was inoculated and incubated at 37°C for 1 hour. The infected cells were washed, and 180 µl of culture medium was added. The culture supernatant (10 µl) was harvested at the indicated timepoints and used for RT-qPCR to quantify the viral RNA copy number (see “RT-qPCR” section below). In the infection experiments using human iPSC-derived airway and lung epithelial cells (**Fig. 3k,l**), working viruses were diluted with Opti-MEM (Thermo Fisher Scientific, Cat# 11058021). The diluted viruses (1,000 TCID<sub>50</sub> in 100 µl) were inoculated onto the apical side of the culture and incubated at 37°C for 1 hour. The inoculated viruses were removed and washed twice with Opti-MEM. For collection of the viruses, 100 µl Opti-MEM was applied onto the apical side of the culture and incubated at 37°C for 10 minutes. The Opti-MEM was collected and used for RT-qPCR to quantify the viral RNA copy number (see “RT-qPCR” section below). The infection experiments using an airway-on-a-chip system (**Fig. 3m**) were performed as described above (see “Airway-on-a-chips” section).

1312

### 1313 RT-qPCR

RT-qPCR was performed as previously described<sup>2,15-19,53,54,64</sup>. Briefly, 5 µl culture supernatant was mixed with 5 µl of 2 × RNA lysis buffer [2% Triton X-100 (Nacalai Tesque, Cat# 35501-15), 50 mM KCl, 100 mM Tris-HCl (pH 7.4), 40% glycerol, 0.8 U/µl recombinant RNase inhibitor (Takara, Cat# 2313B)] and incubated at room temperature for 10 min. RNase-free water (90 µl) was added, and the diluted sample (2.5 µl) was used as the template for real-time RT-PCR performed according to the manufacturer’s protocol using One Step TB Green PrimeScript PLUS RT-PCR kit (Takara, Cat# RR096A) and the following primers: Forward N, 5'-AGC CTC TTC TCG TTC CTC ATC AC-3'; and Reverse N, 5'-CCG CCA TTG CCA GCC ATT C-3'. The viral RNA copy number was standardized with a SARS-CoV-2 direct detection RT-qPCR kit (Takara, Cat# RC300A). Fluorescent signals were acquired using a QuantStudio 1 Real-Time PCR system (Thermo Fisher Scientific), QuantStudio 3 Real-Time PCR system (Thermo Fisher Scientific), QuantStudio 5 Real-Time PCR system (Thermo Fisher Scientific), StepOne Plus Real-Time PCR system (Thermo Fisher Scientific), CFX Connect Real-Time PCR Detection system (Bio-Rad), Eco Real-Time PCR System (Illumina), qTOWER3 G Real-Time System (Analytik Jena) Thermal Cycler Dice Real Time System III (Takara) or 7500 Real-Time PCR System (Thermo Fisher Scientific).

1333

### 1334 Animal experiments

Animal experiments (**Fig. 4 and Extended Data Fig. 2**) were performed as previously described<sup>27</sup>. Syrian hamsters (male, 4 weeks old) were purchased from Japan SLC Inc. (Shizuoka, Japan). For the virus infection experiments, hamsters were anesthetized by intramuscular injection of a mixture of 0.15 mg/kg medetomidine hydrochloride (Domitor<sup>®</sup>, Nippon Zenyaku Kogyo), 2.0 mg/kg midazolam (Dormicum<sup>®</sup>, Fujifilm Wako, Cat# 135-13791) and 2.5 mg/kg butorphanol (Vetorphale<sup>®</sup>, Meiji Seika Pharma) or 0.15 mg/kg medetomidine hydrochloride, 4.0 mg/kg alphaxalone (Alfaxan<sup>®</sup>, Jurox) and 2.5 mg/kg butorphanol. BA.5, BQ1.1 and Delta (10,000 TCID<sub>50</sub> in 100 µl) or saline (100 µl) was intranasally inoculated under anesthesia. Oral swabs were collected at the indicated timepoints. Body weight was recorded daily by 7 d.p.i. Enhanced pause (Penh), the ratio of time to peak expiratory flow relative to the total expiratory time (Rpef) were measured every day until 7 d.p.i. (see below). Lung tissues were anatomically collected at 2 and 5 d.p.i. The viral RNA load in the oral swabs and respiratory tissues was determined by RT-qPCR. These tissues were also used for IHC and histopathological analyses (see below).

1351

# **Lung function test**

Lung function tests (**Fig. 4a**) were routinely performed as previously described<sup>2,15,17,18,54</sup>. The two respiratory parameters (Penh and Rpef) were measured by using a Buxco Small Animal Whole Body Plethysmography system (DSI) according to the manufacturer's instructions. In brief, a hamster was placed in an unrestrained plethysmography chamber and allowed to acclimatize for 30 seconds. Then, data were acquired over a 2.5-minute period by using FinePointe Station and Review software v2.9.2.12849 (DSI).

1360

# **Immunohistochemistry**

Immunohistochemistry (IHC) (**Fig. 4c and Extended Data Fig. 2**) was performed as previously described<sup>2,15,17,18,54</sup> using an Autostainer Link 48 (Dako). The deparaffinized sections were exposed to EnVision FLEX target retrieval solution high pH (Agilent, Cat# K8004) for 20 minutes at 97°C for activation, and a mouse anti-SARS-CoV-2 N monoclonal antibody (clone 1035111, R&D Systems, Cat# MAB10474-SP, 1:400) was used as a primary antibody. The sections were sensitized using EnVision FLEX for 15 minutes and visualized by peroxidase-based enzymatic reaction with 3,3'-diaminobenzidine tetrahydrochloride (Dako, Cat# DM827) as substrate for 5 minutes. The N protein positivity was evaluated by certificated pathologists as previously described<sup>2,15,17,18,54</sup>. Images were incorporated as virtual slides by NDP.scan software v3.2.4 (Hamamatsu Photonics). The N-protein positivity was measured as the area using Fiji software v2.2.0 (ImageJ).

1375

## 1376 **H&E staining**

1377 H&E staining (**Fig. 4d**) was performed as previously described<sup>2,15,17,18,54</sup>. Briefly,  
1378 excised animal tissues were fixed with 10% formalin neutral buffer solution and  
1379 processed for paraffin embedding. The paraffin blocks were sectioned at a  
1380 thickness of 3 µm and then mounted on MAS-GP-coated glass slides  
1381 (Matsunami Glass, Cat# S9901). H&E staining was performed according to a  
1382 standard protocol.

## 1384 **Histopathological scoring**

1385 Histopathological scoring (**Fig. 4e**) was performed as previously  
1386 described<sup>2,15,17,18,54</sup>. Pathological features, including (i) bronchitis or bronchiolitis,  
1387 (ii) hemorrhage with congestive edema, (iii) alveolar damage with epithelial  
1388 apoptosis and macrophage infiltration, (iv) hyperplasia of type II pneumocytes,  
1389 and (v) the area of hyperplasia of large type II pneumocytes, were evaluated by  
1390 certified pathologists, and the degree of these pathological findings was  
1391 arbitrarily scored using a four-tiered system as 0 (negative), 1 (weak), 2  
1392 (moderate), and 3 (severe). The "large type II pneumocytes" are type II  
1393 pneumocytes with hyperplasia exhibiting more than 10-µm-diameter nuclei. We  
1394 described "large type II pneumocytes" as one of the notable histopathological  
1395 features of SARS-CoV-2 infection in our previous studies<sup>2,15,17,18,54</sup>. The total  
1396 histological score is the sum of these five indices.

## 1398 **Statistics and reproducibility**

1399 Statistical significance was tested using a two-sided Mann–Whitney *U* test, a  
1400 two-sided Student's *t* test, a two-sided Welch's *t* test, or a two-sided paired *t*-test  
1401 unless otherwise noted. The tests above were performed using Prism 9 software  
1402 v9.1.1 (GraphPad Software).

1403 In the time-course experiments (**Fig. 3e–m, 4a–b,e**), a multiple  
1404 regression analysis including experimental conditions (i.e., the types of infected  
1405 viruses) as explanatory variables and timepoints as qualitative control variables  
1406 was performed to evaluate the difference between experimental conditions  
1407 thorough all timepoints. The initial time point was removed from the analysis.  
1408 The *P* value was calculated by a two-sided Wald test. Subsequently, familywise  
1409 error rates (FWERs) were calculated by the Holm method. These analyses were  
1410 performed on R v4.1.2 (<https://www.r-project.org/>).

1411 Principal component analysis to representing the antigenicity of the S  
1412 proteins was performed (**Fig. 2d**). The NT50 values for biological replicates were  
1413 scaled, and subsequently, principal component analysis was performed using  
1414 the prcomp function on R v4.1.2 (<https://www.r-project.org/>).

1415 In **Fig. 4c,d, and Extended Data Fig. 2**, photographs shown are the  
1416 representative areas of at least two independent experiments by using four

1417 hamsters at each timepoint.

1418

1419 **Data availability**

1420 All databases/datasets used in this study are available from the GISAID  
 1421 database (<https://www.gisaid.org>; EPI\_SET\_221203cz, EPI\_SET\_221203ep,  
 1422 EPI\_SET\_221203qr, EPI\_SET\_221203se, and EPI\_SET\_221203vk) and GenBank  
 1423 database (<https://www.ncbi.nlm.nih.gov/genbank/>). Viral genome sequencing  
 1424 data for working viral stocks are available in the GitHub repository  
 1425 (<https://github.com/TheSatoLab/BQ.1>).

1426

1427 **Code availability**

1428 The computational codes used in the present study and the GISAID  
 1429 supplemental tables for EPI\_SET\_221203cz, EPI\_SET\_221203ep,  
 1430 EPI\_SET\_221203qr, EPI\_SET\_221203se, and EPI\_SET\_221203vk are available  
 1431 in the GitHub repository (<https://github.com/TheSatoLab/BQ.1>).

## 1432 References

- 1433 1 WHO. "Tracking SARS-CoV-2 variants (October 28, 2022)"  
1434 <https://www.who.int/en/activities/tracking-SARS-CoV-2-variants>. (2022).
- 1435 2 Saito, A. *et al.* Virological characteristics of the SARS-CoV-2 Omicron  
1436 BA.2.75 variant. *Cell Host Microbe*, doi:10.1016/j.chom.2022.10.003  
1437 (2022).
- 1438 3 Wang, Q. *et al.* Antibody evasion by SARS-CoV-2 Omicron subvariants  
1439 BA.2.12.1, BA.4, & BA.5. *Nature*, doi:10.1038/s41586-022-05053-w  
1440 (2022).
- 1441 4 Tuekprakhon, A. *et al.* Antibody escape of SARS-CoV-2 Omicron BA.4  
1442 and BA.5 from vaccine and BA.1 serum. *Cell* **185**, 2422-2433 e2413,  
1443 doi:10.1016/j.cell.2022.06.005 (2022).
- 1444 5 Cao, Y. *et al.* BA.2.12.1, BA.4 and BA.5 escape antibodies elicited by  
1445 Omicron infection. *Nature*, doi:10.1038/s41586-022-04980-y (2022).
- 1446 6 Cao, Y. *et al.* Imprinted SARS-CoV-2 humoral immunity induces  
1447 convergent Omicron RBD evolution. *BioRxiv*, doi:  
1448 <https://doi.org/10.1101/2022.1109.1115.507787> (2022).
- 1449 7 Makowski, E. K., Schardt, J. S., Smith, M. D. & Tessier, P. M. Mutational  
1450 analysis of SARS-CoV-2 variants of concern reveals key tradeoffs  
1451 between receptor affinity and antibody escape. *PLoS Comput Biol* **18**,  
1452 e1010160, doi:10.1371/journal.pcbi.1010160 (2022).
- 1453 8 Aggarwal, A. *et al.* Mechanistic insights into the effects of key mutations  
1454 on SARS-CoV-2 RBD-ACE2 binding. *Phys Chem Chem Phys* **23**,  
1455 26451-26458, doi:10.1039/d1cp04005g (2021).
- 1456 9 Deshpande, A., Harris, B. D., Martinez-Sobrido, L., Kobie, J. J. & Walter,  
1457 M. R. Epitope Classification and RBD Binding Properties of Neutralizing  
1458 Antibodies Against SARS-CoV-2 Variants of Concern. *Front Immunol* **12**,  
1459 691715, doi:10.3389/fimmu.2021.691715 (2021).
- 1460 10 Cao, Y. *et al.* Characterization of the enhanced infectivity and antibody  
1461 evasion of Omicron BA.2.75. *Cell Host Microbe* **30**, 1527-1539 e1525,  
1462 doi:10.1016/j.chom.2022.09.018 (2022).
- 1463 11 Qu, P. *et al.* Evasion of neutralizing antibody responses by the  
1464 SARS-CoV-2 BA.2.75 variant. *Cell Host Microbe* **30**, 1518-1526 e1514,  
1465 doi:10.1016/j.chom.2022.09.015 (2022).
- 1466 12 Wang, Q. *et al.* Antigenic characterization of the SARS-CoV-2 Omicron  
1467 subvariant BA.2.75. *Cell Host Microbe* **30**, 1512-1517 e1514,  
1468 doi:10.1016/j.chom.2022.09.002 (2022).
- 1469 13 Zhou, T. *et al.* Structural basis for potent antibody neutralization of  
1470 SARS-CoV-2 variants including B.1.1.529. *Science* **376**, eabn8897,  
1471 doi:10.1126/science.abn8897 (2022).
- 1472 14 Cao, Y. *et al.* Omicron escapes the majority of existing SARS-CoV-2

- 1473 neutralizing antibodies. *Nature* **602**, 657-663,  
1474 doi:10.1038/s41586-021-04385-3 (2022).
- 1475 15 Kimura, I. *et al.* Virological characteristics of the novel SARS-CoV-2  
1476 Omicron variants including BA.4 and BA.5. *Cell* **185**, 3992-4007 e3916  
1477 (2022).
- 1478 16 Saito, A. *et al.* Enhanced fusogenicity and pathogenicity of SARS-CoV-2  
1479 Delta P681R mutation. *Nature* **602**, 300-306,  
1480 doi:10.1038/s41586-021-04266-9 (2022).
- 1481 17 Suzuki, R. *et al.* Attenuated fusogenicity and pathogenicity of  
1482 SARS-CoV-2 Omicron variant. *Nature*, doi:10.1038/s41586-022-04462-1  
1483 (2022).
- 1484 18 Yamasoba, D. *et al.* Virological characteristics of the SARS-CoV-2  
1485 Omicron BA.2 spike. *Cell*, doi:10.1016/j.cell.2022.04.035 (2022).
- 1486 19 Motozono, C. *et al.* SARS-CoV-2 spike L452R variant evades cellular  
1487 immunity and increases infectivity. *Cell Host Microbe* **29**, 1124-1136,  
1488 doi:10.1016/j.chom.2021.06.006 (2021).
- 1489 20 GitHub. "BE.1.1.1 sublineage with Orf1b:Y264H and S:N460K ( 69  
1490 sequences ) emerged in Nigeria ( 14 seqs ) (August 26, 2022)".  
1491 <https://github.com/cov-lineages/pango-designation/issues/993>. (2022).
- 1492 21 Arora, P. *et al.* Omicron sublineage BQ.1.1 resistance to monoclonal  
1493 antibodies. *Lancet Infect Dis*, doi:10.1016/S1473-3099(22)00733-2  
1494 (2022).
- 1495 22 Dejnirattisai, W. *et al.* SARS-CoV-2 Omicron-B.1.1.529 leads to  
1496 widespread escape from neutralizing antibody responses. *Cell* **185**,  
1497 467-484 e415, doi:10.1016/j.cell.2021.12.046 (2022).
- 1498 23 Zahradnik, J. *et al.* SARS-CoV-2 variant prediction and antiviral drug  
1499 design are enabled by RBD in vitro evolution. *Nat Microbiol* **6**, 1188-1198,  
1500 doi:10.1038/s41564-021-00954-4 (2021).
- 1501 24 Kimura, I. *et al.* The SARS-CoV-2 Lambda variant exhibits enhanced  
1502 infectivity and immune resistance. *Cell Rep* **38**, 110218,  
1503 doi:10.1016/j.celrep.2021.110218 (2022).
- 1504 25 Nasser, H. *et al.* Monitoring fusion kinetics of viral and target cell  
1505 membranes in living cells using a SARS-CoV-2 spike-protein-mediated  
1506 membrane fusion assay. *STAR Protoc* **3**, 101773,  
1507 doi:10.1016/j.xpro.2022.101773 (2022).
- 1508 26 Hashimoto, R. *et al.* SARS-CoV-2 disrupts the respiratory vascular barrier  
1509 by suppressing Claudin-5 expression. *Sci Adv* **8**, eabo6783, doi:doi:  
1510 10.1126/sciadv.abo6783 (2022).
- 1511 27 . (!!! INVALID CITATION !!! 2,15-18).
- 1512 28 Martin, D. P. *et al.* Selection Analysis Identifies Clusters of Unusual  
1513 Mutational Changes in Omicron Lineage BA.1 That Likely Impact Spike

- 1514 Function. *Mol Biol Evol* **39**, doi:10.1093/molbev/msac061 (2022).
- 1515 29 Wang, Q. *et al.* Alarming antibody evasion properties of rising  
1516 SARS-CoV-2 BQ and XBB subvariants. *BioRxiv*, doi:  
1517 <https://doi.org/10.1101/2022.1111.1123.517532> (2022).
- 1518 30 Uraki, R. *et al.* Characterization and antiviral susceptibility of  
1519 SARS-CoV-2 Omicron/BA.2. *Nature*, doi:10.1038/s41586-022-04856-1  
1520 (2022).
- 1521 31 Sasaki, A., Lion, S. & Boots, M. Antigenic escape selects for the evolution  
1522 of higher pathogen transmission and virulence. *Nat Ecol Evol* **6**, 51-62,  
1523 doi:10.1038/s41559-021-01603-z (2022).
- 1524 32 Ozono, S. *et al.* SARS-CoV-2 D614G spike mutation increases entry  
1525 efficiency with enhanced ACE2-binding affinity. *Nat Commun* **12**, 848,  
1526 doi:10.1038/s41467-021-21118-2 (2021).
- 1527 33 Ferreira, I. *et al.* SARS-CoV-2 B.1.617 mutations L452R and E484Q are  
1528 not synergistic for antibody evasion. *J Infect Dis* **224**, 989-994,  
1529 doi:10.1093/infdis/jiab368 (2021).
- 1530 34 Matsuyama, S. *et al.* Enhanced isolation of SARS-CoV-2 by  
1531 TMPRSS2-expressing cells. *Proc Natl Acad Sci U S A* **117**, 7001-7003,  
1532 doi:10.1073/pnas.2002589117 (2020).
- 1533 35 Yamamoto, M. *et al.* The anticoagulant nafamostat potently inhibits  
1534 SARS-CoV-2 S protein-mediated fusion in a cell fusion assay system and  
1535 viral infection *in vitro* in a cell-type-dependent manner. *Viruses* **12**,  
1536 doi:10.3390/v12060629 (2020).
- 1537 36 Chen, S., Zhou, Y., Chen, Y. & Gu, J. fastp: an ultra-fast all-in-one  
1538 FASTQ preprocessor. *Bioinformatics* **34**, i884-i890,  
1539 doi:10.1093/bioinformatics/bty560 (2018).
- 1540 37 Li, H. & Durbin, R. Fast and accurate short read alignment with  
1541 Burrows-Wheeler transform. *Bioinformatics* **25**, 1754-1760,  
1542 doi:10.1093/bioinformatics/btp324 (2009).
- 1543 38 Li, H. *et al.* The sequence alignment/map format and SAMtools.  
1544 *Bioinformatics* **25**, 2078-2079, doi:10.1093/bioinformatics/btp352 (2009).
- 1545 39 Cingolani, P. *et al.* A program for annotating and predicting the effects of  
1546 single nucleotide polymorphisms, SnpEff: SNPs in the genome of  
1547 *Drosophila melanogaster* strain w1118; iso-2; iso-3. *Fly (Austin)* **6**, 80-92,  
1548 doi:10.4161/fly.19695 (2012).
- 1549 40 Khare, S. *et al.* GISAID's role in pandemic response. *China CDC Wkly* **3**,  
1550 1049-1051, doi:10.46234/ccdcw2021.255 (2021).
- 1551 41 Li, H. Minimap2: pairwise alignment for nucleotide sequences.  
1552 *Bioinformatics* **34**, 3094-3100, doi:10.1093/bioinformatics/bty191 (2018).
- 1553 42 Capella-Gutierrez, S., Silla-Martinez, J. M. & Gabaldon, T. trimAl: a tool  
1554 for automated alignment trimming in large-scale phylogenetic analyses.

- 1555 *Bioinformatics* **25**, 1972-1973, doi:10.1093/bioinformatics/btp348 (2009).
- 1556 43 Stamatakis, A. RAxML version 8: a tool for phylogenetic analysis and
- 1557 post-analysis of large phylogenies. *Bioinformatics* **30**, 1312-1313,
- 1558 doi:10.1093/bioinformatics/btu033 (2014).
- 1559 44 Katoh, K. & Standley, D. M. MAFFT multiple sequence alignment
- 1560 software version 7: improvements in performance and usability. *Mol Biol*
- 1561 *Evol* **30**, 772-780, doi:10.1093/molbev/mst010 (2013).
- 1562 45 Nguyen, L. T., Schmidt, H. A., von Haeseler, A. & Minh, B. Q. IQ-TREE: a
- 1563 fast and effective stochastic algorithm for estimating maximum-likelihood
- 1564 phylogenies. *Mol Biol Evol* **32**, 268-274, doi:10.1093/molbev/msu300
- 1565 (2015).
- 1566 46 Sagulenko, P., Puller, V. & Neher, R. A. TreeTime: Maximum-likelihood
- 1567 phylodynamic analysis. *Virus Evol* **4**, vex042, doi:10.1093/ve/vex042
- 1568 (2018).
- 1569 47 Huerta-Cepas, J., Serra, F. & Bork, P. ETE 3: Reconstruction, Analysis,
- 1570 and Visualization of Phylogenomic Data. *Mol Biol Evol* **33**, 1635-1638,
- 1571 doi:10.1093/molbev/msw046 (2016).
- 1572 48 Obermeyer, F. *et al.* Analysis of 6.4 million SARS-CoV-2 genomes
- 1573 identifies mutations associated with fitness. *Science* **376**, 1327-1332,
- 1574 doi:10.1126/science.abm1208 (2022).
- 1575 49 Niwa, H., Yamamura, K. & Miyazaki, J. Efficient selection for
- 1576 high-expression transfectants with a novel eukaryotic vector. *Gene* **108**,
- 1577 193-199, doi:10.1016/0378-1119(91)90434-d (1991).
- 1578 50 Uriu, K. *et al.* Neutralization of the SARS-CoV-2 Mu variant by
- 1579 convalescent and vaccine serum. *N Engl J Med* **385**, 2397-2399,
- 1580 doi:10.1056/NEJMc2114706 (2021).
- 1581 51 Uriu, K. *et al.* Characterization of the immune resistance of SARS-CoV-2
- 1582 Mu variant and the robust immunity induced by Mu infection. *J Infect Dis*,
- 1583 doi:10.1093/infdis/jiac053 (2022).
- 1584 52 Yamasoba, D. *et al.* Neutralisation sensitivity of SARS-CoV-2 omicron
- 1585 subvariants to therapeutic monoclonal antibodies. *Lancet Infect Dis* **22**,
- 1586 942-943, doi:10.1016/S1473-3099(22)00365-6 (2022).
- 1587 53 Kimura, I. *et al.* SARS-CoV-2 spike S375F mutation characterizes the
- 1588 Omicron BA.1 variant. *BioRxiv*, doi:
- 1589 <https://doi.org/10.1101/2022.1104.1103.486864> (2022).
- 1590 54 Tamura, T. *et al.* Comparative pathogenicity of SARS-CoV-2 Omicron
- 1591 subvariants including BA.1, BA.2, and BA.5. *BioRxiv*, doi:
- 1592 <https://doi.org/10.1101/2022.1108.1105.502758> (2022).
- 1593 55 Reed, L. J. & Muench, H. A simple method of estimating fifty percent
- 1594 endpoints. *Am J Hygiene* **27**, 493-497 (1938).
- 1595 56 Zahradnik, J. *et al.* A protein-engineered, enhanced yeast display

1596 platform for rapid evolution of challenging targets. *ACS Synth Biol* **10**,  
1597 3445-3460, doi:10.1021/acssynbio.1c00395 (2021).  
1598 57 Ozono, S., Zhang, Y., Tobiume, M., Kishigami, S. & Tokunaga, K.  
1599 Super-rapid quantitation of the production of HIV-1 harboring a  
1600 luminescent peptide tag. *J Biol Chem* **295**, 13023-13030,  
1601 doi:10.1074/jbc.RA120.013887 (2020).  
1602 58 Kondo, N., Miyauchi, K. & Matsuda, Z. Monitoring viral-mediated  
1603 membrane fusion using fluorescent reporter methods. *Curr Protoc Cell*  
1604 *Biol* **Chapter 26**, Unit 26 29, doi:10.1002/0471143030.cb2609s50 (2011).  
1605 59 Sano, E. *et al.* Cell response analysis in SARS-CoV-2 infected bronchial  
1606 organoids. *Commun Biol* **5**, 516, doi:10.1038/s42003-022-03499-2  
1607 (2022).  
1608 60 Yamamoto, Y. *et al.* Long-term expansion of alveolar stem cells derived  
1609 from human iPS cells in organoids. *Nat Methods* **14**, 1097-1106,  
1610 doi:10.1038/nmeth.4448 (2017).  
1611 61 Konishi, S. *et al.* Directed induction of functional multi-ciliated cells in  
1612 proximal airway epithelial spheroids from human pluripotent stem cells.  
1613 *Stem Cell Reports* **6**, 18-25, doi:10.1016/j.stemcr.2015.11.010 (2016).  
1614 62 Gotoh, S. *et al.* Generation of alveolar epithelial spheroids via isolated  
1615 progenitor cells from human pluripotent stem cells. *Stem Cell Reports* **3**,  
1616 394-403, doi:10.1016/j.stemcr.2014.07.005 (2014).  
1617 63 Deguchi, S. *et al.* Usability of polydimethylsiloxane-based microfluidic  
1618 devices in pharmaceutical research using human hepatocytes. *ACS*  
1619 *Biomater Sci Eng* **7**, 3648-3657, doi:10.1021/acsbiomaterials.1c00642  
1620 (2021).  
1621 64 Meng, B. *et al.* Altered TMPRSS2 usage by SARS-CoV-2 Omicron  
1622 impacts tropism and fusogenicity. *Nature*,  
1623 doi:10.1038/s41586-022-04474-x (2022).  
1624

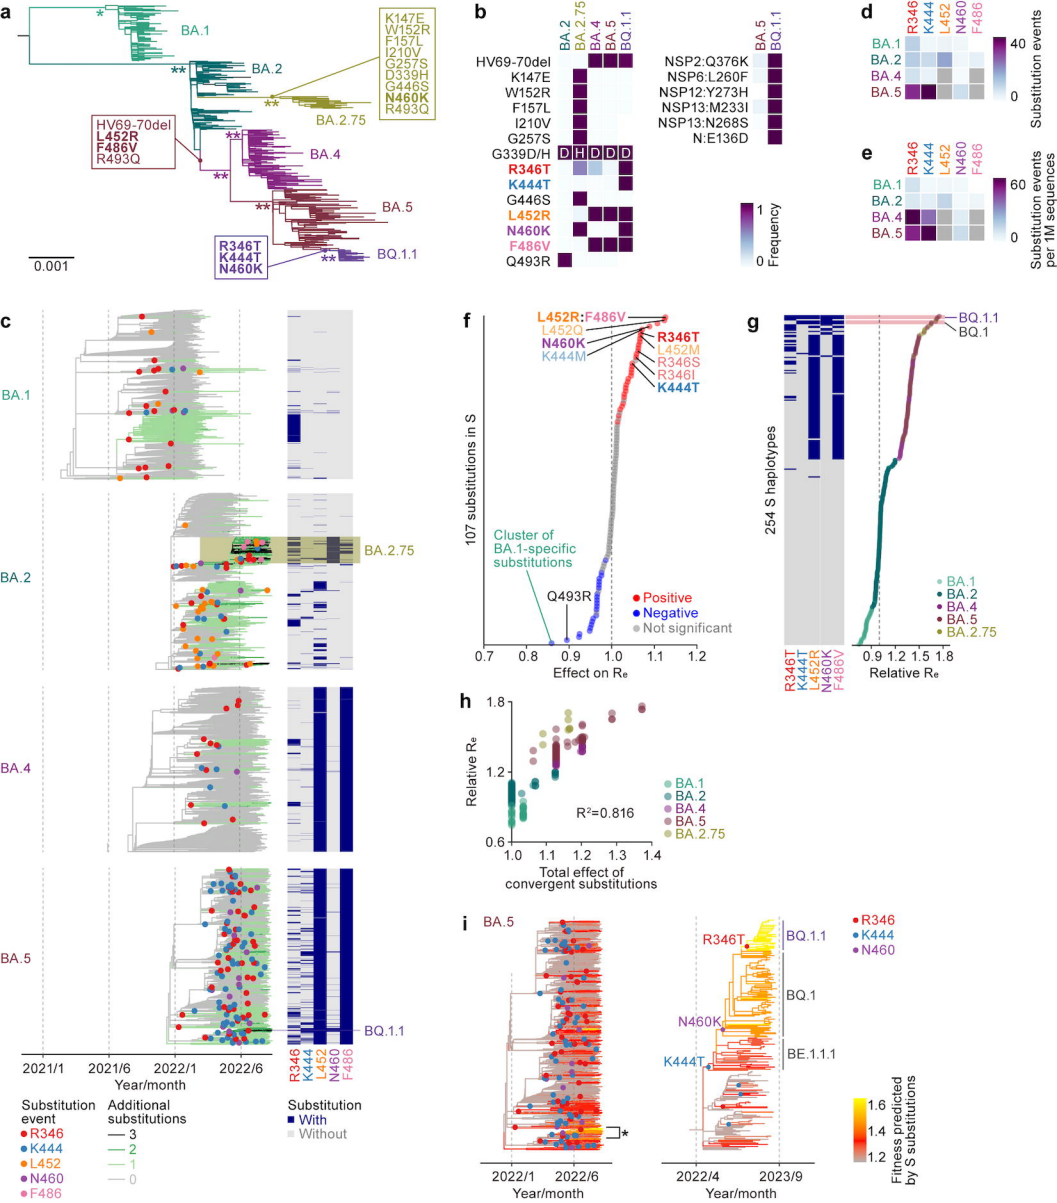

**a** BA.2 breakthrough infection sera (n=14)

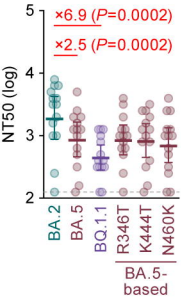

**b** BA.5 breakthrough infection sera (n=20)

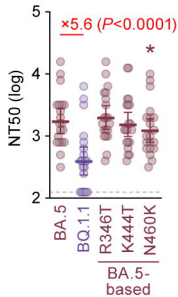

**c** BA.2 infection sera (hamster) (n=12)

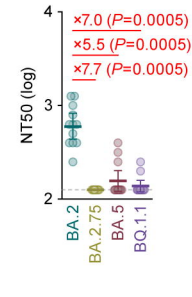

BA.2.75 infection sera (hamster) (n=12)

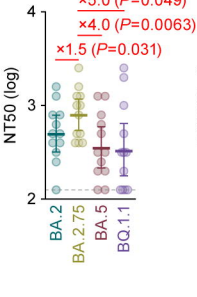

BA.5 infection sera (hamster) (n=12)

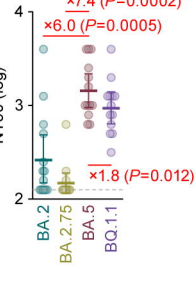

**d** Antigenic cartography

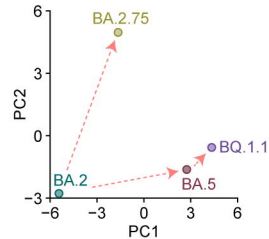

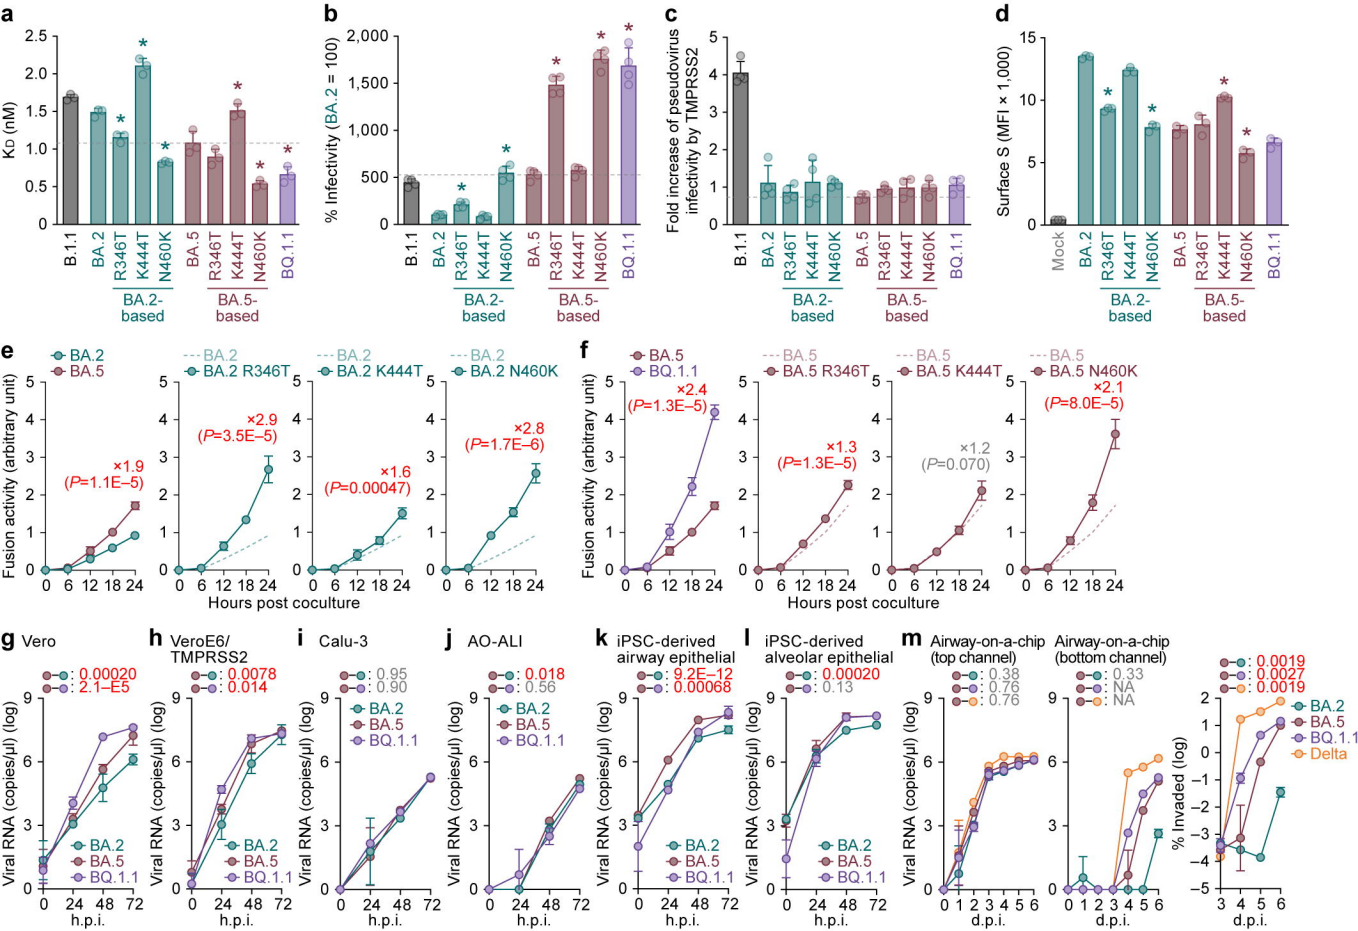

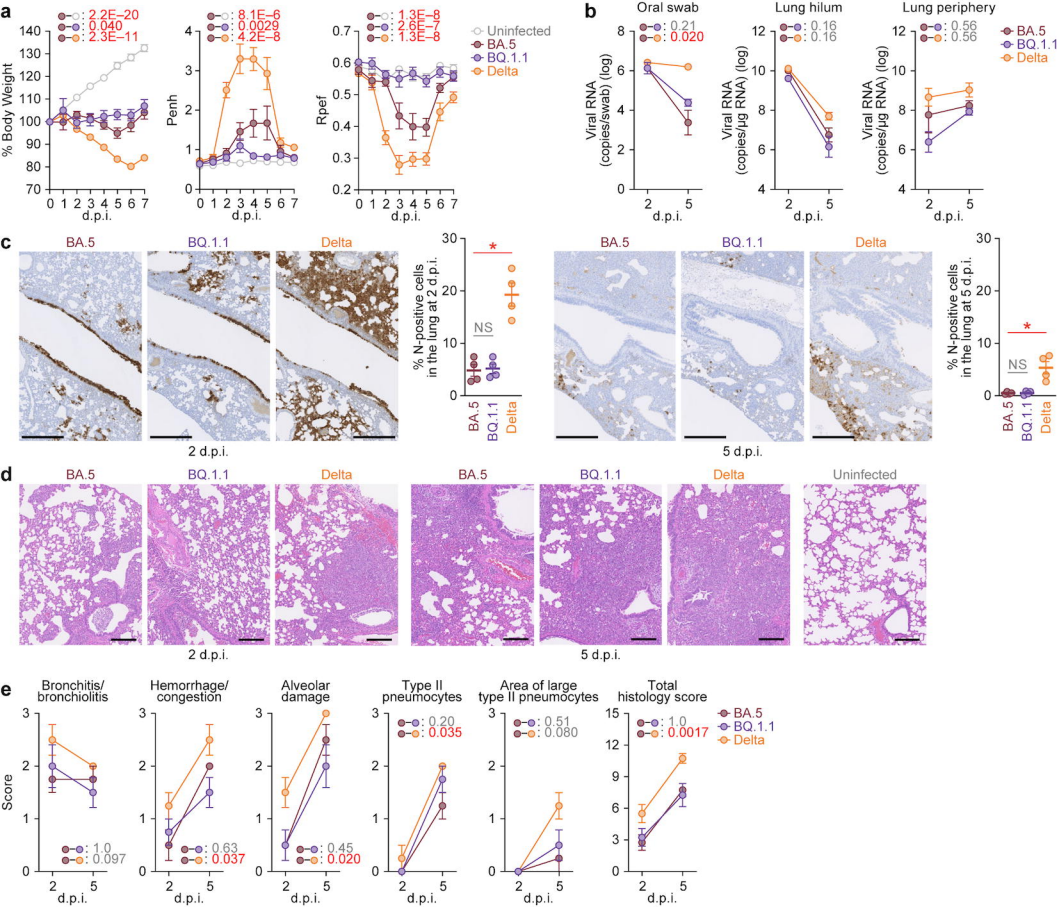

Source: https://www.biorxiv.org/content/10.1101/2022.12.05.519085v1.full.pdf
